# Supplementary material for: Pd(OAc)2 catalyzed direct arylation of electron-deficient arenes without ligands or with monoprotected amino acid assistance
Source: Royal Society of Chemistry journal article supplement (doi:10.1039/c2cc34949c), 2012-01-01

# **Pd(OAc)<sub>2</sub> Catalyzed Direct Arylation of Electron-Deficient Arenes without Ligands or with Monoprotected Amino Acid Ligands Assistance**

Ya-Nong Wang, Xu-Qing Guo, Xiao-Han Zhu, Rui Zhong, Li-Hua Cai,  
and Xiu-Feng Hou\*

*Department of Chemistry, Fudan University, 220 Handan Road, Shanghai, 200433, P. R. China*  
xfhou@fudan.edu.cn

## **Supporting Information**

|                                                                         |           |
|-------------------------------------------------------------------------|-----------|
| General Experimental Section                                            | S2        |
| General Experimental Procedures                                         | S2        |
| Initial Rate Measurements                                               | S2-S4     |
| Experimental Data                                                       | S5 – S10  |
| Spectra of Products ( <sup>1</sup> H, <sup>13</sup> C, <sup>19</sup> F) | S11 - S36 |

## General Experimental Section

All reactions were carried out under nitrogen atmosphere using standard Schlenk techniques. N, N-dimethylacetamide (DMA) was distilled under nitrogen from calcium hydride and stored under nitrogen. All other chemical reagents were obtained from commercial sources and used without further purification. Nuclear magnetic resonance (NMR) spectra were recorded using Bruker spectrometers operating at 400 MHz ( $^1\text{H}$ ), 100 MHz ( $^{13}\text{C}$ ) and 377 MHz ( $^{19}\text{F}$ ) at room temperature in  $\text{CDCl}_3$ . High resolution mass spectrometry (HRMS) was performed using the Waters Micromass GCT Premier. A gas chromatography-mass spectra (Thermo Focus ISQ) was also used.

## General Experimental Procedures

Under air atmosphere,  $\text{Pd}(\text{OAc})_2$  (0.006 mmol, 1.3 mg), mono-N-protected amino acid ligand (0.006 mmol),  $\text{K}_2\text{CO}_3$  (0.25 mmol, 34 mg), pivalic acid (6-51 mg) and 1,3,5-trimethoxybenzene (0.2 mmol, 33.6 mg) were added into a dried Schlenk tube. The reaction vessel was evacuated and backfilled with nitrogen for three times. Then the arene (0.5 mL), aryl halide (0.2 mmol) and DMA (2 mL) were added by syringe. The reaction mixture was heated at 110 °C for 24 h. After cooling down, the mixture was diluted with petroleum ether (10 mL), filtered through a pad of silica gel, followed by washing the pad of the silica gel with the same solvent (20 mL). The filtrate was washed with water (15 mL  $\times$  3). The organic phase was dried over  $\text{Na}_2\text{SO}_4$ , filtered, and then concentrated under reduced pressure. The residue was analyzed by  $^1\text{H}$  NMR spectroscopy directly, or purified by flash chromatography to afford the corresponding product.

## Initial Rate Measurements

Under air atmosphere,  $\text{Pd}(\text{OAc})_2$  (0.006 mmol, 1.3 mg), Ac-Ile-OH (0.006 mmol, 1.0 mg, under condition II),  $\text{K}_2\text{CO}_3$  (0.25 mmol, 34 mg), pivalic acid (6 or 51 mg) were added into a dried Schlenk tube. The reaction vessel was evacuated and backfilled with nitrogen for three times. Then the **1a** or **1a'** (0.5 mL), 4-bromotoluene **2a** (0.2 mmol, 34 mg) and DMA (2 mL) were added

by syringe. The reaction mixture was stirred at room temperature for 5 min, and then at 110 °C for the appropriate time. At regular intervals, one of the reactions would be removed from hot plate to 0 °C in an ice bath. A 2.0 N HCl solution (4 mL) and petroleum ether (10 mL) were added. Then the reaction mixture was filtered through a pad of silica gel, followed by washing the pad of the silica gel with the same solvent (20 mL). The filtrate was washed with water (15 mL × 3). The organic phase was dried over Na<sub>2</sub>SO<sub>4</sub>, filtered, and then concentrated under reduced pressure. The residue was analyzed by <sup>1</sup>H NMR spectroscopy directly. The conversion was determined by integration of the benzyl proton signals, which appears as singlets (approximately 2.28 ppm for **2a**, 2.42 ppm for **3a** and 2.40 ppm for **3a'**). Each reaction was repeated three times. The resulting data was plotted, and linear regression established the initial rate. The determinations of initial rate for the arylation of substrate **1a** under both conditions are shown in Figure S1 and Figure S2.

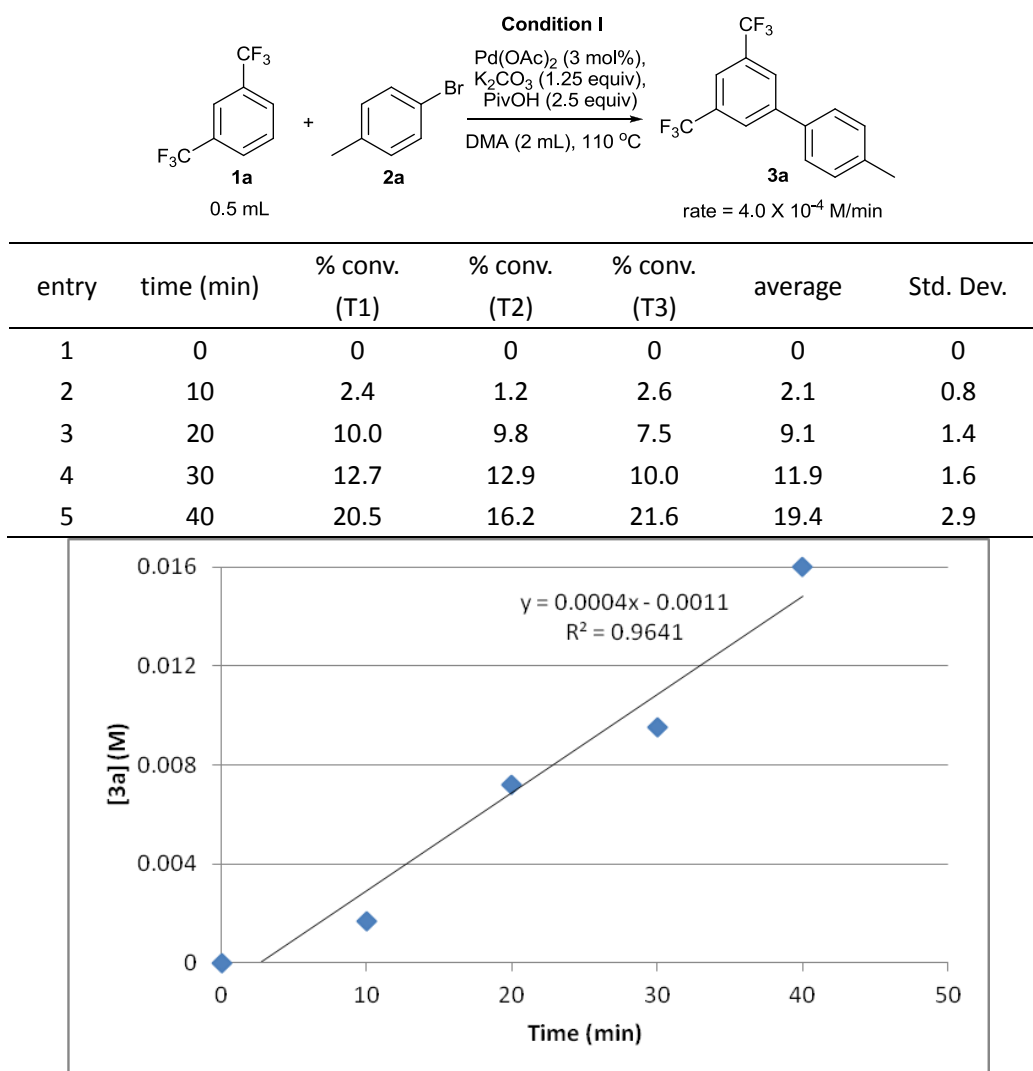

**Figure S1:** The initial rate data for arylation of substrate **1a** under condition I. Each data point represents the average of three trials.

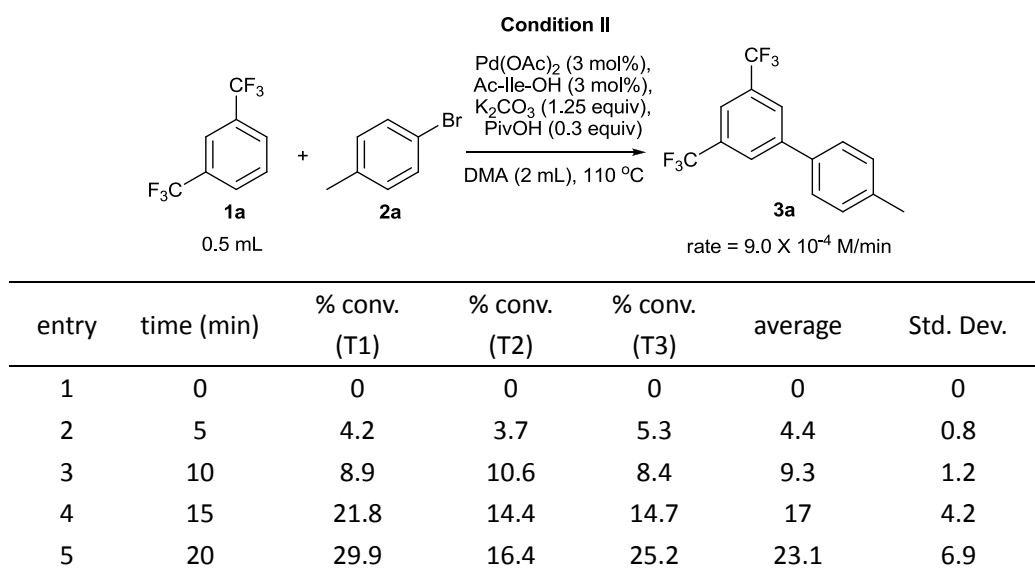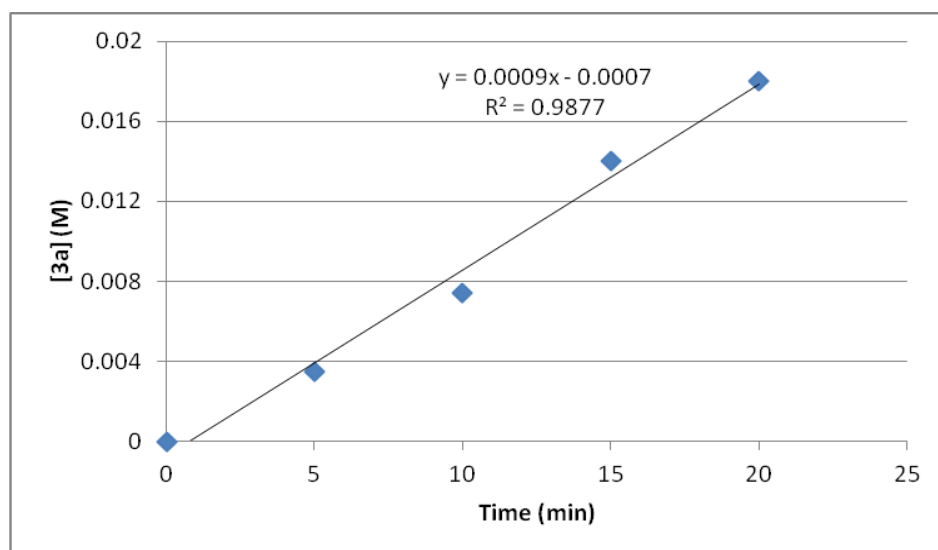

**Figure S2:** The initial rate data for arylation of substrate **1a** under condition II. Each data point represents the average of three trials.

## Experimental Data

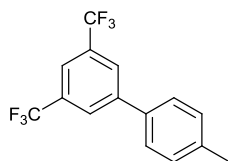

4'-Methyl-3,5-bis(trifluoromethyl)biphenyl (**3a**)<sup>1,2</sup>

<sup>1</sup>H NMR (500 MHz, CDCl<sub>3</sub>):  $\delta$  7.99 (s, 1H), 7.82 (s, 1H), 7.50 (d,  $J$  = 10.5 Hz, 2H), 7.30 (d,  $J$  = 10.0 Hz, 2H), 2.42 (s, 3H); <sup>13</sup>C NMR (100 MHz, CDCl<sub>3</sub>):  $\delta$  143.32, 139.06, 135.42, 132.13 (q,  $J$  = 32.9 Hz), 130.06, 127.11, 127.03, 123.51 (d,  $J$  = 271.5 Hz), 120.67-120.56 (m), 21.22; <sup>19</sup>F NMR (377 MHz, CDCl<sub>3</sub>):  $\delta$  -61.72 (s, 6F); GC/MS: M/Z = 304. 23.

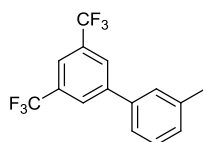

3'-Methyl-3,5-bis(trifluoromethyl)biphenyl (**3b**)

<sup>1</sup>H NMR (400 MHz, CDCl<sub>3</sub>):  $\delta$  8.00 (s, 2H), 7.84 (s, 1H), 7.40 (s, 3H), 7.26 (s, 1H), 2.45 (s, 3H); <sup>13</sup>C NMR (100 MHz, CDCl<sub>3</sub>):  $\delta$  143.45, 139.06, 138.12, 132.18 (q,  $J$  = 33.0 Hz), 129.60, 129.16, 127.93, 127.20, 124.76 (d,  $J$  = 271.2 Hz), 124.34, 120.77 (m), 21.47; <sup>19</sup>F NMR (377 MHz, CDCl<sub>3</sub>):  $\delta$  -62.75 (s, 6F); HRMS (EI) calcd for C<sub>15</sub>H<sub>10</sub>F<sub>6</sub>: 304.0687 (M<sup>+</sup>), found: 304.0688.

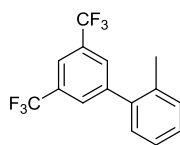

2-Methyl-3',5'-bis(trifluoromethyl)biphenyl (**3c**)

<sup>1</sup>H NMR (400 MHz, CDCl<sub>3</sub>):  $\delta$  7.88 (s, 1H), 7.80 (s, 2H), 7.29 (m, 3H), 7.24 (d,  $J$  = 7.2 Hz, 1H), 2.28 (s, 3H); <sup>13</sup>C NMR (100 MHz, CDCl<sub>3</sub>):  $\delta$  143.94, 138.81, 135.15, 131.51 (q,  $J$  = 33 Hz), 130.79, 129.59, 129.34, 128.65, 126.28, 123.38 (d,  $J$  = 271.2 Hz), 120.76 (m), 20.20; <sup>19</sup>F NMR (377 MHz, CDCl<sub>3</sub>):  $\delta$  -62.69 (s, 6F); HRMS (EI) calcd for C<sub>15</sub>H<sub>10</sub>F<sub>6</sub>: 304.0687 (M<sup>+</sup>), found: 304.0690.

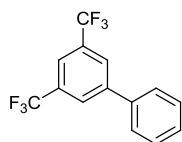

3,5-Bis(trifluoromethyl)biphenyl (**3d**)<sup>3, 4</sup>

<sup>1</sup>H NMR (400 MHz, CDCl<sub>3</sub>):  $\delta$  7.43 (m, 3H), 7.59 (m, 2H), 7.85 (s, 1H), 8.01 (s, 2H); <sup>13</sup>C NMR (100 MHz, CDCl<sub>3</sub>):  $\delta$  143.30, 138.22, 132.24 (q,  $J$  = 33.2 Hz), 129.26, 128.86, 127.23, 124.72, 121.94, 120.88 (m); <sup>19</sup>F NMR (377 MHz, CDCl<sub>3</sub>):  $\delta$  -62.73(s, 6F); GC/MS:  $M/Z$  = 290.12.

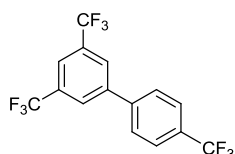

3,4',5-Tris(trifluoromethyl)biphenyl (**3e**)

<sup>1</sup>H NMR (400 MHz, CDCl<sub>3</sub>):  $\delta$  8.02 (s, 1H), 7.93 (s, 2H), 7.77 (d,  $J$  = 8.0 Hz, 2H), 7.72 (d,  $J$  = 8.4 Hz, 2H); <sup>13</sup>C NMR (100 MHz, CDCl<sub>3</sub>):  $\delta$  141.87, 141.69, 131.96 (q,  $J$  = 32.8 Hz), 130.44 (q,  $J$  = 32.8 Hz), 127.69, 127.39, 126.27, 126.24, 125.96 (d,  $J$  = 141.8 Hz), 121.83; <sup>19</sup>F NMR (377 MHz, CDCl<sub>3</sub>):  $\delta$  - 78.20 (s, 3F), -78.40 (s, 6F); HRMS (EI) calcd for C<sub>15</sub>H<sub>7</sub>F<sub>9</sub>: 358.0404 ( $M^+$ ), found: 358.0401.

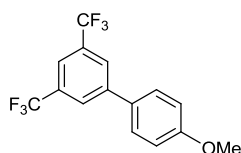

4'-Methoxy-3,5-bis(trifluoromethyl)biphenyl (**3f**)<sup>2</sup>

<sup>1</sup>H NMR (400 MHz, CDCl<sub>3</sub>):  $\delta$  7.97 (s, 2H), 7.80 (s, 1H), 7.57 (d,  $J$  = 8.4 Hz, 2H), 7.04 (d,  $J$  = 8.4 Hz, 2H), 3.87 (s, 3H); <sup>13</sup>C NMR (100 MHz, CDCl<sub>3</sub>):  $\delta$  160.33, 142.88, 132.18 (q,  $J$  = 32.8 Hz), 130.60, 128.37, 126.62, 124.79 (d,  $J$  = 271.6 Hz), 120.18 (m), 114.69, 55.40; <sup>19</sup>F NMR (377 MHz, CDCl<sub>3</sub>):  $\delta$  -62.75 (s, 6F); GC/MS:  $M/Z$  = 320.13.

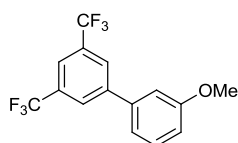

3'-Methoxy-3,5-bis(trifluoromethyl)biphenyl (**3g**)

$^1\text{H}$  NMR (400 MHz,  $\text{CDCl}_3$ ):  $\delta$  3.89 (s, 3H), 6.98 (d,  $J=8.4$  Hz, 1H), 7.10 (s, 1H), 7.17 (d,  $J=7.6$  Hz, 1H), 7.42 (t,  $J=7.6$ , 1H), 7.99 (s, 2H);  $^{13}\text{C}$  NMR (100 MHz,  $\text{CDCl}_3$ ):  $\delta$  160.24, 143.18, 139.66, 131.55 (q,  $J=32.4$  Hz), 130.34, 127.25, 124.72 (d,  $J=252.8$  Hz), 121.01 (m), 119, 62, 114.04, 113.11, 55.41;  $^{19}\text{F}$  NMR (377 MHz,  $\text{CDCl}_3$ ):  $\delta$  - 62.75 (s, 6F); HRMS (EI) calcd for  $\text{C}_{15}\text{H}_{10}\text{F}_6\text{O}$ : 320.0636 ( $\text{M}^+$ ), found: 320.0634.

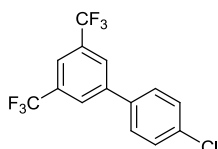

4'-Chloro-3,5-bis(trifluoromethyl)biphenyl (**3h**)

$^1\text{H}$  NMR (400 MHz,  $\text{CDCl}_3$ ):  $\delta$  7.97 (s, 2H), 7.87 (s, 1H), 7.56 (d,  $J = 7.6$  Hz, 2H), 7.49 (d,  $J = 7.6$  Hz, 2H);  $^{13}\text{C}$  NMR (100 MHz,  $\text{CDCl}_3$ ):  $\delta$  142.07, 136.61, 135.25, 131.78 (q,  $J = 33.2$  Hz), 129.49, 128.49, 127.02, 124.62 (q,  $J = 271.2$  Hz), 121.20 (m);  $^{19}\text{F}$  NMR (377 MHz,  $\text{CDCl}_3$ ):  $\delta$  - 62.78 (s, 6F); HRMS (EI) calcd for  $\text{C}_{14}\text{H}_7\text{ClF}_6$ : 324.0140 ( $\text{M}^+$ ), found: 324.0138.

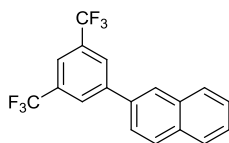

2-(3,5-Bis(trifluoromethyl)phenyl)naphthalene (**3i**)

$^1\text{H}$  NMR (400 MHz,  $\text{CDCl}_3$ ):  $\delta$  8.15 (s, 2H), 8.07 (s, 1H), 8.04 (m, 4H), 7.73 (d,  $J = 8.0$  Hz, 1H), 7.58 (m, 2H);  $^{13}\text{C}$  NMR (100 MHz,  $\text{CDCl}_3$ ):  $\delta$  143.22, 140.36, 135.40, 133.47, 133.16, 132.34 (q,  $J = 33.2$  Hz), 129.18, 128.36, 127.73, 127.41, 126.89, 126.56, 124.67, 122.60 (d,  $J = 54.2$  Hz), 120.91(m);  $^{19}\text{F}$  NMR (377 MHz,  $\text{CDCl}_3$ ):  $\delta$  -62.66; HRMS (EI) calcd for  $\text{C}_{18}\text{H}_{10}\text{F}_6$ : 340.0687 ( $\text{M}^+$ ), found: 340.0684.

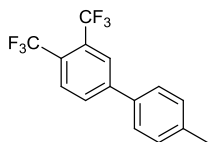

4'-Methyl-3,4-bis(trifluoromethyl)biphenyl (**3j**)

$^1\text{H}$  NMR (400 MHz,  $\text{CDCl}_3$ ):  $\delta$  8.03 (s, 1H), 7.89 (d,  $J = 8.0$  Hz, 1H), 7.84 (d,  $J = 8.1$  Hz, 1H), 7.51 (d,  $J = 7.6$  Hz, 2H), 7.31 (d,  $J = 7.2$  Hz, 2H), 2.42 (s, 3H);  $^{13}\text{C}$  NMR (100 MHz,  $\text{CDCl}_3$ ):  $\delta$

145.14, 139.14, 135.25, 129.95, 129.88, 128.48, 128.42, 127.07, 126.34, 126.28, 126.22, 126.17, 21.17;  $^{19}\text{F}$  NMR (377 MHz,  $\text{CDCl}_3$ ):  $\delta$  -59.00 (s, 3F), -59.33 (s, 3F); HRMS (EI) calcd for  $\text{C}_{15}\text{H}_{10}\text{F}_6$ : 304.0687 ( $\text{M}^+$ ), found: 304.0685.

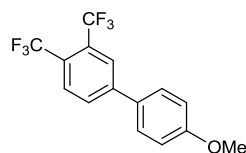

4'-Methoxy-3,4-bis(trifluoromethyl)biphenyl (**3k**)

$^1\text{H}$  NMR (400 MHz,  $\text{CDCl}_3$ ):  $\delta$  7.99 (s, 1H), 7.88 (d,  $J$  = 8.0 Hz, 1H), 7.81 (d,  $J$  = 8.0 Hz, 1H), 7.56 (d,  $J$  = 7.2 Hz, 2H), 7.03 (d,  $J$  = 8.4 Hz, 2H), 3.87 (s, 3H);  $^{13}\text{C}$  NMR (100 MHz,  $\text{CDCl}_3$ ):  $\delta$  160.46, 144.77, 130.46, 129.49, 128.40, 125.98, 125.92, 125.86, 125.81, 124.23, 121.52, 114.67, 55.39;  $^{19}\text{F}$  NMR (377 MHz,  $\text{CDCl}_3$ ):  $\delta$  -59.97 (s, 3F), -59.32 (s, 3F); HRMS (EI) calcd for  $\text{C}_{15}\text{H}_{10}\text{F}_6\text{O}$ : 320.0636 ( $\text{M}^+$ ), found: 320.0641.

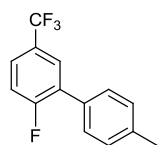

2-Fluoro-4'-methyl-5-(trifluoromethyl)biphenyl (**3l**)

$^1\text{H}$  NMR (400 MHz,  $\text{CDCl}_3$ ):  $\delta$  7.75 (d,  $J$  = 5.2 Hz, 1H), 7.62 (m, 1H), 7.49 (d,  $J$  = 6.8 Hz, 2H), 7.33 (d,  $J$  = 8.0 Hz, 2H), 7.28 (s, 1H), 2.46 (s, 3H);  $^{13}\text{C}$  NMR (100 MHz,  $\text{CDCl}_3$ ):  $\delta$  161.50 (d,  $J$  = 251.3 Hz), 138.40, 131.36, 129.88 (d,  $J$  = 14.8 Hz), 129.39, 128.81, 128.13 (m), 126.96 (d,  $J$  = 33.0 Hz), 125.88 (m), 123.84 (d,  $J$  = 270.6 Hz), 116.70 (d,  $J$  = 24.3 Hz), 21.20;  $^{19}\text{F}$  NMR (377 MHz,  $\text{CDCl}_3$ ):  $\delta$  -61.85 (s, 3F), -112.48 (s, 1F); HRMS (EI) calcd for  $\text{C}_{14}\text{H}_{10}\text{F}_4$ : 254.0719 ( $\text{M}^+$ ), found: 254.0720.

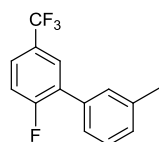

2-Fluoro-3'-methyl-5-(trifluoromethyl)biphenyl (**3m**)

$^1\text{H}$  NMR (400 MHz,  $\text{CDCl}_3$ ):  $\delta$  7.71 (d,  $J$  = 7.2 Hz, 1H), 7.57 (s, 1H), 7.35 (s, 3H), 7.23 (d,  $J$  = 8.4 Hz, 2H), 2.42 (s, 3H);  $^{13}\text{C}$  NMR (100 MHz,  $\text{CDCl}_3$ ):  $\delta$  161.48 (d,  $J$  = 252 Hz), 138.38, 134.23,



130.06 (d,  $J = 14.9$  Hz), 129.61, 129.17, 128.55, 128.26, 127.14, 126.06, 125.19, 122.48, 116.70 (d,  $J = 24.7$  Hz), 21.44;  $^{19}\text{F}$  NMR (377 MHz,  $\text{CDCl}_3$ ):  $\delta$  -77.20 (s, 3F), -140.18 (s, 1F); HRMS (EI) calcd for  $\text{C}_{14}\text{H}_{10}\text{F}_4$ : 254.0719 ( $\text{M}^+$ ), found: 254.0714.

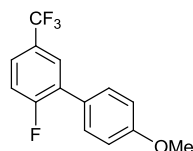

2-Fluoro-4'-methoxy-5-(trifluoromethyl)biphenyl (**3n**)

$^1\text{H}$  NMR (400 MHz,  $\text{CDCl}_3$ ):  $\delta$  7.69 (d,  $J = 5.2$  Hz, 1H), 7.54 (s, 1H), 7.49 (d,  $J = 7.2$  Hz, 2H), 7.22 (d,  $J = 9.2$  Hz, 1H), 7.00 (d,  $J = 8.8$  Hz, 2H), 3.86 (s, 3H);  $^{13}\text{C}$  NMR (100 MHz,  $\text{CDCl}_3$ ):  $\delta$  161.53 (d,  $J = 250.5$  Hz), 159.89, 130.23, 129.64 (d,  $J = 14.1$  Hz), 128.00, 126.69, 125.68, 125.60, 123.95 (d,  $J = 270.5$  Hz), 116.81 (d,  $J = 23.5$  Hz), 114.26, 55.46;  $^{19}\text{F}$  NMR (377 MHz,  $\text{CDCl}_3$ ):  $\delta$  -77.21 (s, 3F), -140.67 (s, 1F); HRMS (EI) calcd for  $\text{C}_{14}\text{H}_{10}\text{F}_4\text{O}$ : 270.0668 ( $\text{M}^+$ ), found: 270.0670.

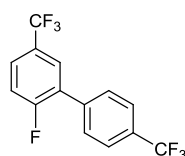

2-Fluoro-4',5-bis(trifluoromethyl)biphenyl (**3o**)

$^1\text{H}$  NMR (400 MHz,  $\text{CDCl}_3$ ):  $\delta$  7.75 (s, 1H), 7.73 (s, 2H), 7.67 (d,  $J = 8.0$  Hz, 3H), 7.33-7.28 (m, 1H);  $^{13}\text{C}$  NMR (100 MHz,  $\text{CDCl}_3$ ):  $\delta$  161.41 (d,  $J = 252.9$  Hz), 137.82, 130.56 (d,  $J = 32.1$  Hz), 129.37, 128.51 (d,  $J = 14.5$  Hz), 128.13, 127.18, 125.66, 125.63, 125.16 (d,  $J = 36.7$  Hz), 122.45 (d,  $J = 36.2$ ), 117.04 (d,  $J = 24$  Hz);  $^{19}\text{F}$  NMR (377 MHz,  $\text{CDCl}_3$ ):  $\delta$  -77.33 (s, 3F), -78.21 (s, 3F), -140.02 (s, 1F); HRMS (EI) calcd for  $\text{C}_{14}\text{H}_7\text{F}_7$ : 308.0436 ( $\text{M}^+$ ), found: 308.0440.

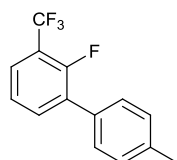

2-Fluoro-4'-methyl-3-(trifluoromethyl)biphenyl (**3p**)

$^1\text{H}$  NMR (400 MHz,  $\text{CDCl}_3$ ):  $\delta$  7.63-7.54 (m, 2H), 7.43 (d,  $J = 7.6$  Hz, 2H), 7.28 (s, 3H), 2.41 (s, 3H);  $^{13}\text{C}$  NMR (100 MHz,  $\text{CDCl}_3$ ):  $\delta$  138.41, 134.70, 131.45, 130.76 (d,  $J = 13.3$  Hz), 129.89 (d,  $J$

= 7.7 Hz), 129.45, 129.02, 127.02 (d,  $J = 11.9$  Hz), 125.87 (d,  $J = 4.0$  Hz), 124.13, 121.54, 21.31;

$^{19}\text{F}$  NMR (377 MHz,  $\text{CDCl}_3$ ):  $\delta$  -76.45 (s, 3F), -149.54 (s, 1F); HRMS (EI) calcd for  $\text{C}_{14}\text{H}_{10}\text{F}_4$ : 254.0719 ( $\text{M}^+$ ), found: 254.0717.

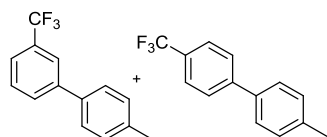

4'-Methyl-3-(trifluoromethyl)biphenyl (**3q**) and 4-methyl-4'-(trifluoromethyl)biphenyl (**3q'**)<sup>5</sup>

$^1\text{H}$  NMR(400 MHz,  $\text{CDCl}_3$ ):  $\delta$  7.83 (s, 1H), 7.77 (m, 1H), 7.68 (s, 1H), 7.58 (m, 1H), 7.50 (m, 2H), 7.30 (d,  $J = 7.6$ , 2H), 2.42 (s, 3H);  $^{13}\text{C}$  NMR (100 MHz,  $\text{CDCl}_3$ ):  $\delta$  144.7, 141.91, 138.12, 137.93, 136.85, 130.18, 129.69, 129.15, 127.15, 127.09, 126.99, 125.66 (m), 123.71 (m); GC/MS:  $\text{M/Z} = 236.18$ .

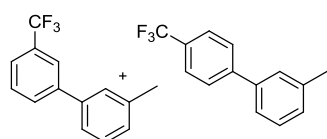

3-methyl-3'-(trifluoromethyl)biphenyl (**3r**) and 3-methyl-4'-(trifluoromethyl)biphenyl (**3r'**)<sup>6</sup>

$^1\text{H}$  NMR (400 MHz,  $\text{CDCl}_3$ ):  $\delta$  7.82 (s, 1H), 7.76 (d,  $J = 7.2$  Hz, 1H), 7.68 (s, 1H), 7.60 (m, 1H), 7.40 (m, 3H), 7.22 (d,  $J = 6.4$  Hz, 1H), 2.43 (s, 3H);  $^{13}\text{C}$  NMR (100 MHz,  $\text{CDCl}_3$ ):  $\delta$  142.12, 139.73, 138.66, 130.41, 129.13, 128.88, 128.75, 128.02, 127.93, 127.39, 125.67 (m), 124.37, 124.28, 123.93 (m), 21.48; GC/MS:  $\text{M/Z} = 236.20$ .

## References for known compounds

- (1) H.A.Chiong, Q. -N. Pham and O. Daugulis, *J. Am. Chem.Soc.*, 2007, **129**, 9879.
- (2) A. C. Spivey, C. J.G. Gripton, J. P. Hannah, C. -C. Tseng, P. Fraine, N. J. Parr and J. J. Scicinski, *Appl. Organometal. Chem.*, 2007, **21**, 572.
- (3) T. Tu, X. Feng, Z. Wang and X. Liu, *Dalton Trans.*, 2010, **39**, 10598.
- (4) Z. Liu, T. Zhang and M. Shi, *Orgnometallic*, 2008, **27**, 2668.
- (5) L. Ackermann and A. Althammer, *Org. Lett.*, 2006, **8**, 3457.
- (6) S. Bhunia, S. Md. A. Sohel, C. -C. Yang, S. -F. Lush, F. -M. Shen and R. -S. Liu, *J. Organometal. Chem.*, 2009, **694**, 566.

# Spectra of products ( $^1\text{H}$ , $^{13}\text{C}$ , $^{19}\text{F}$ )

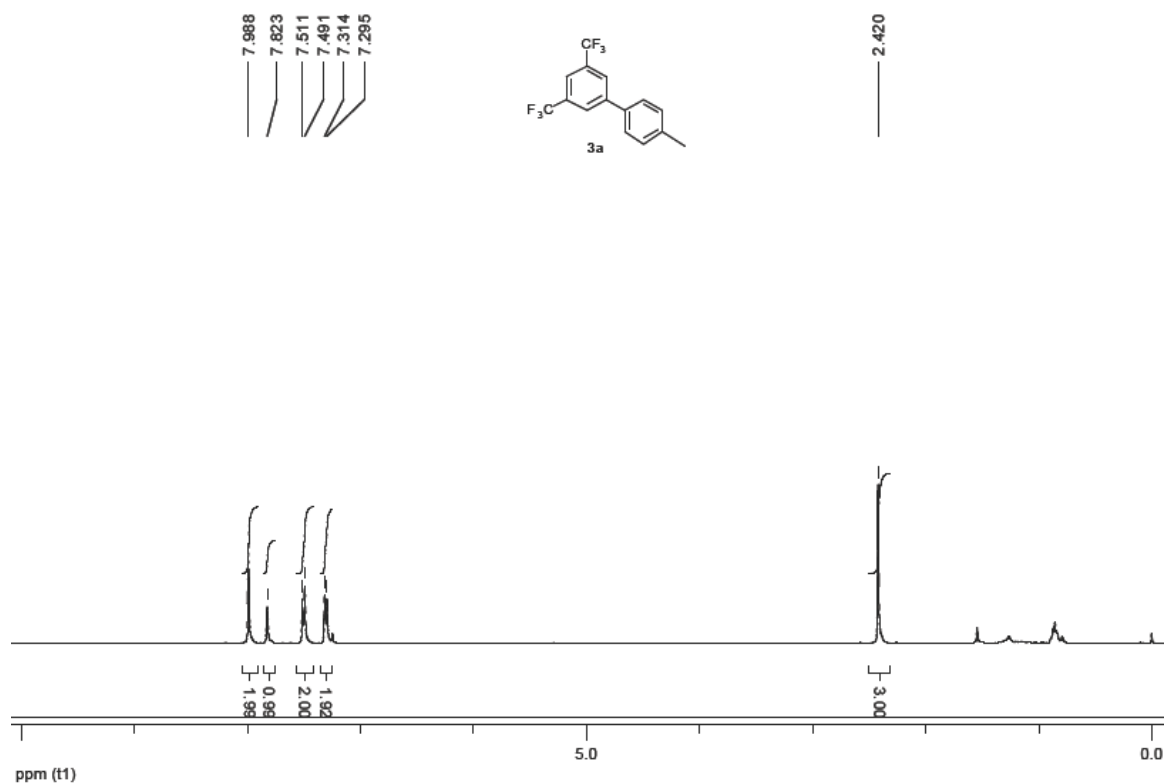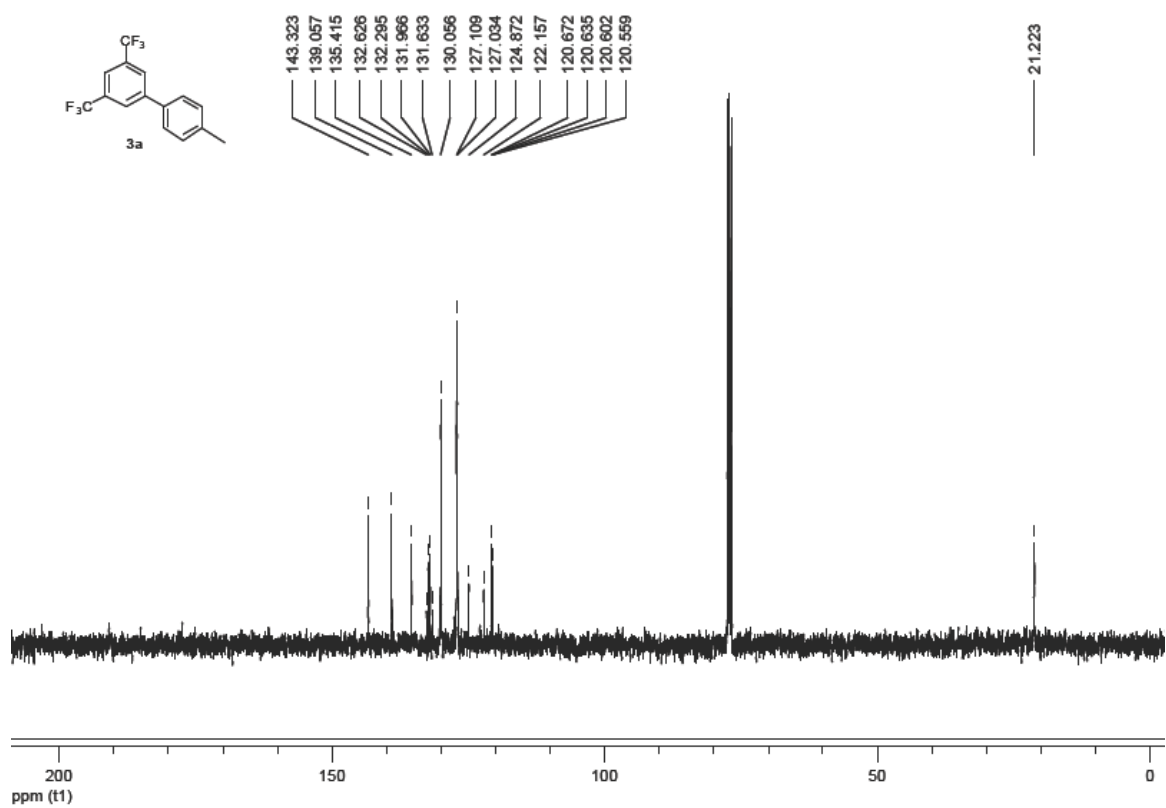

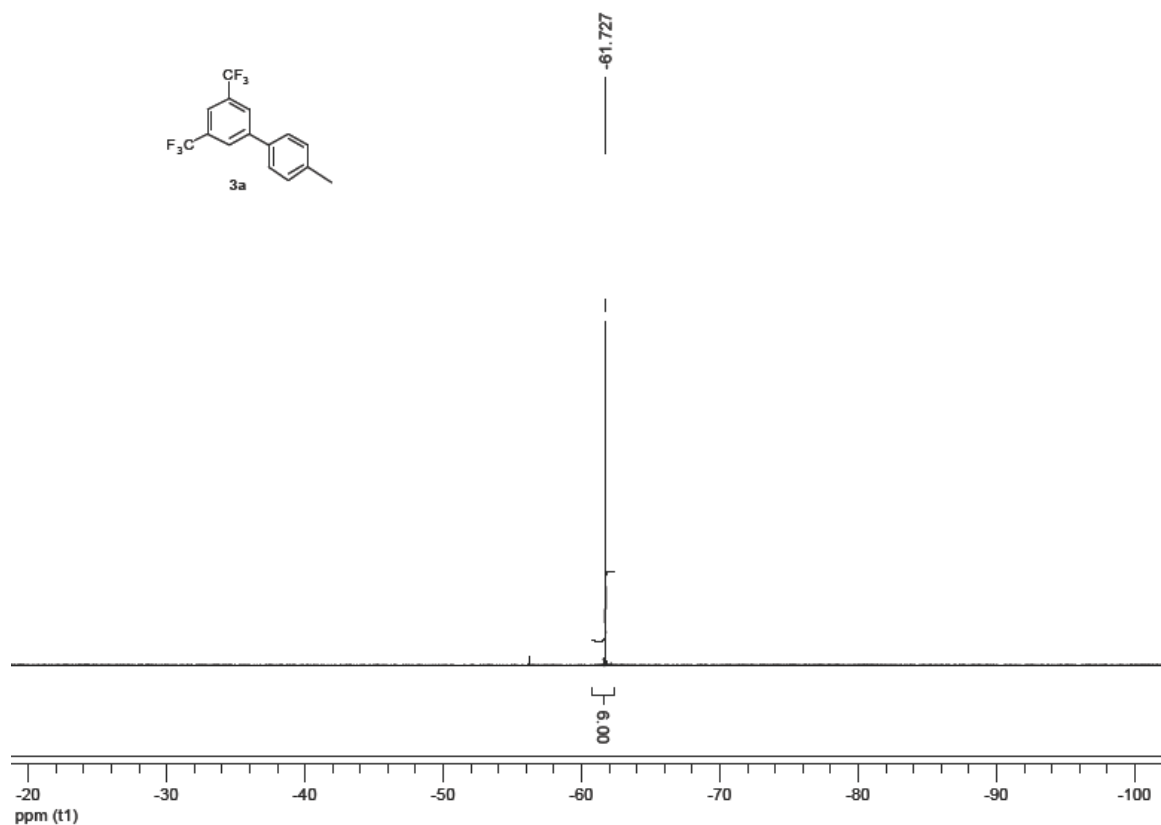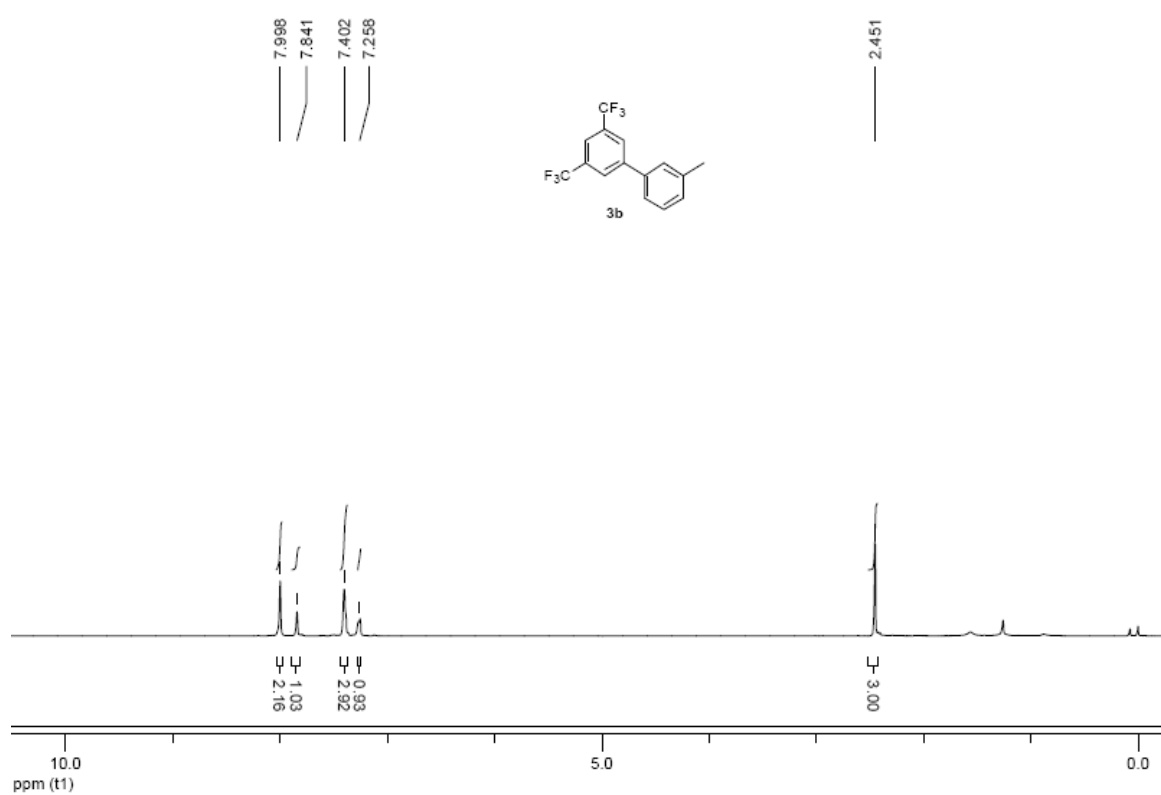

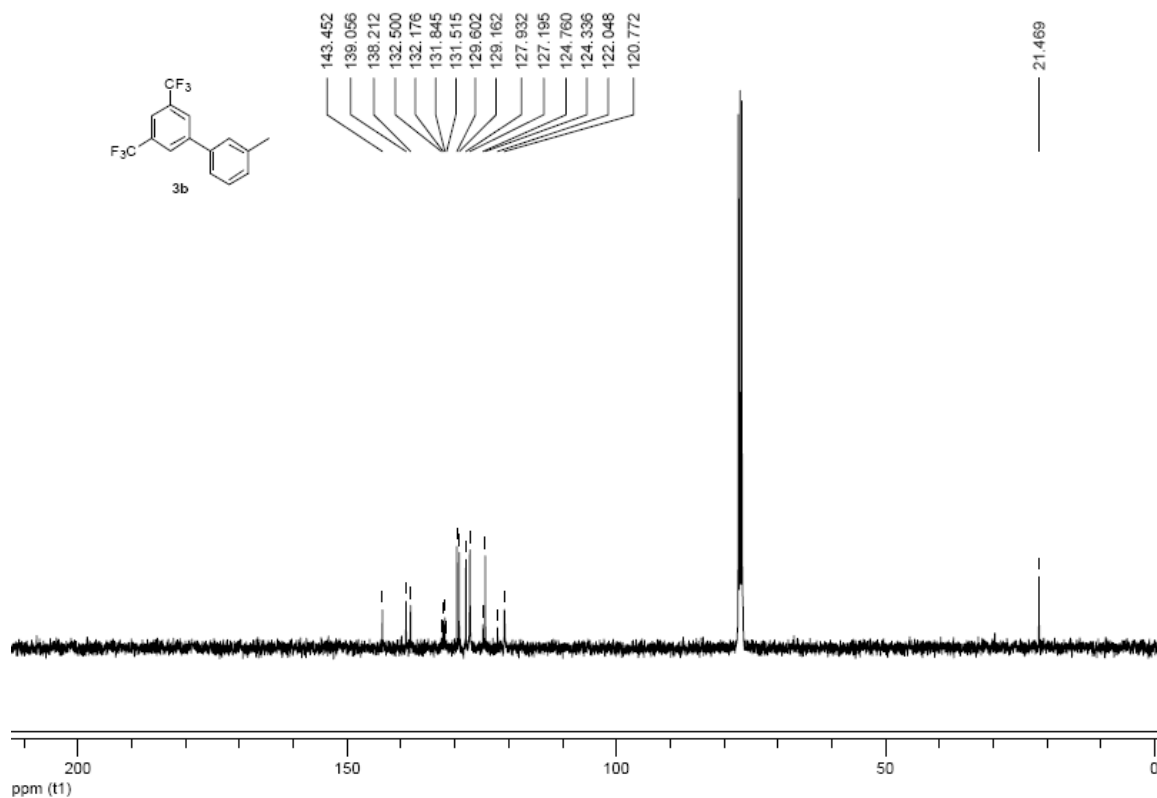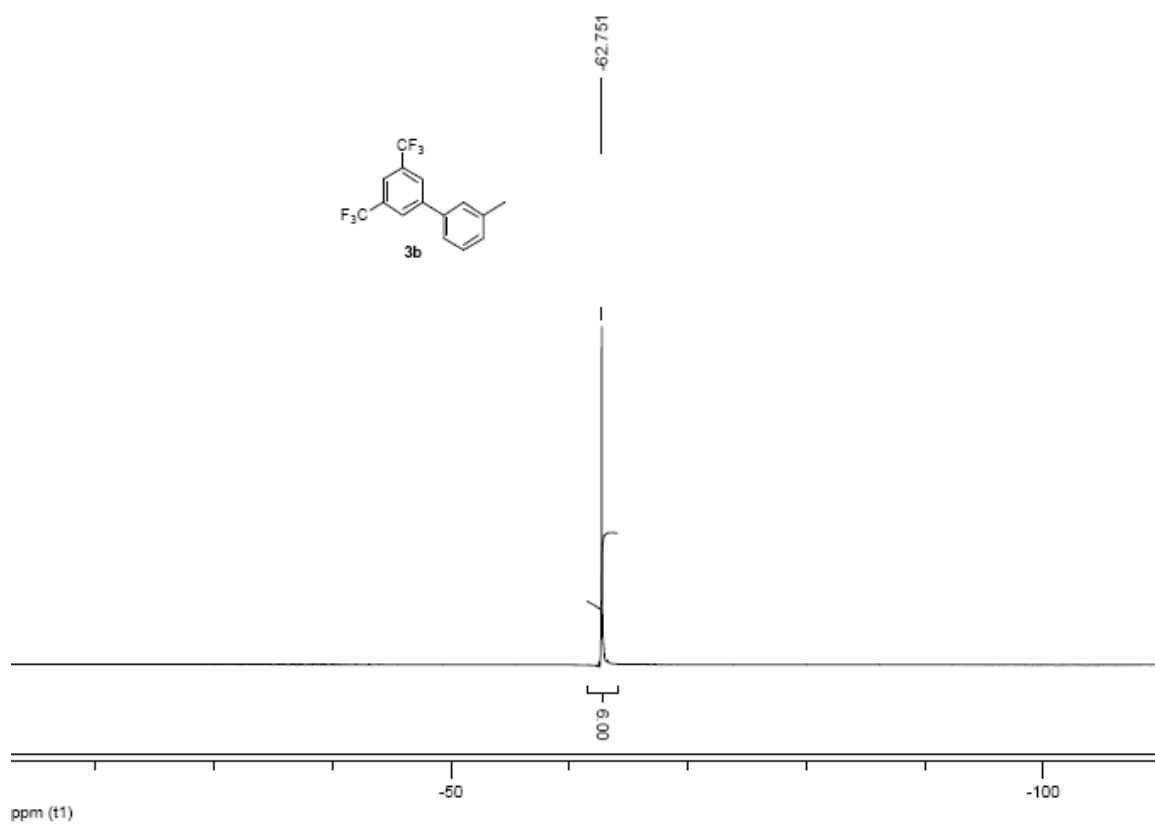

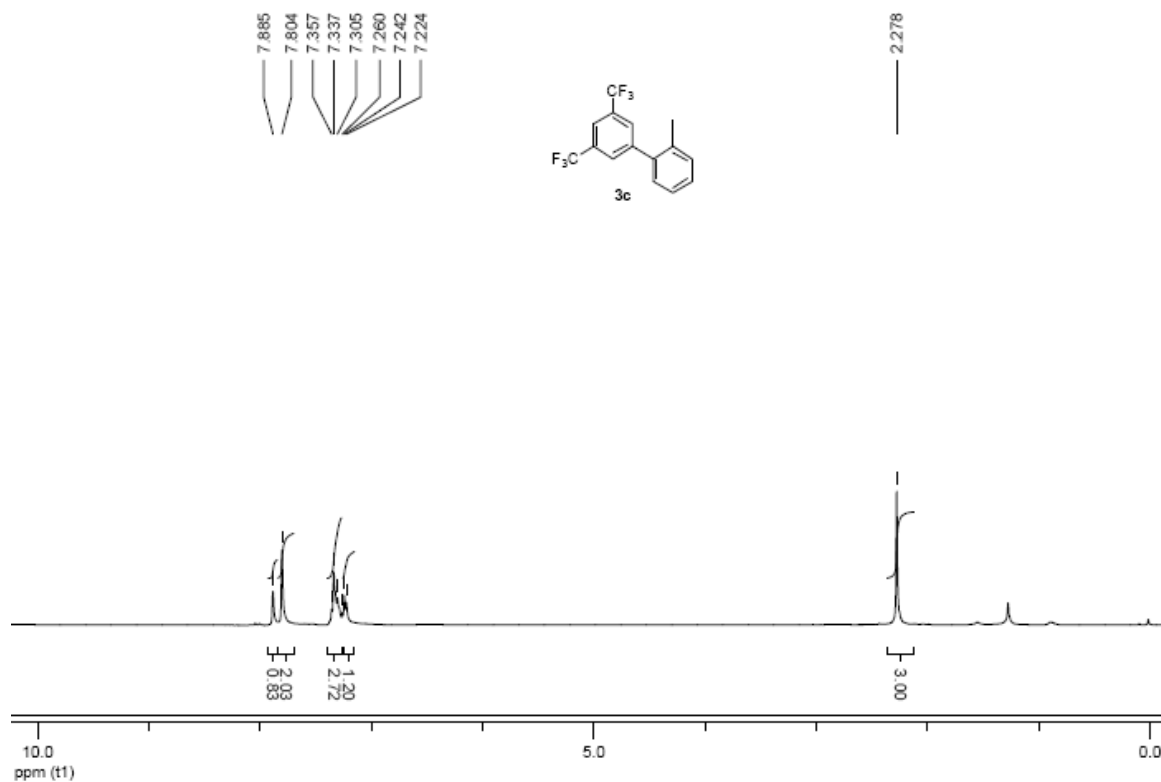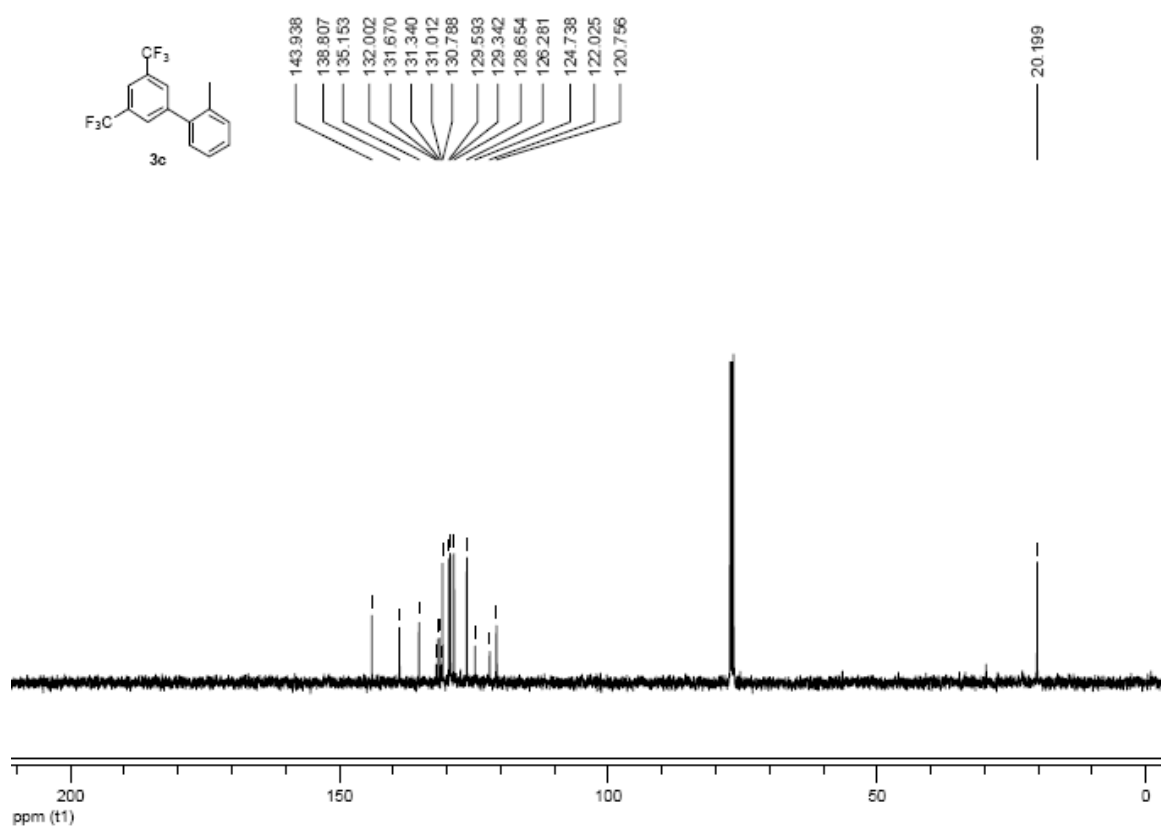

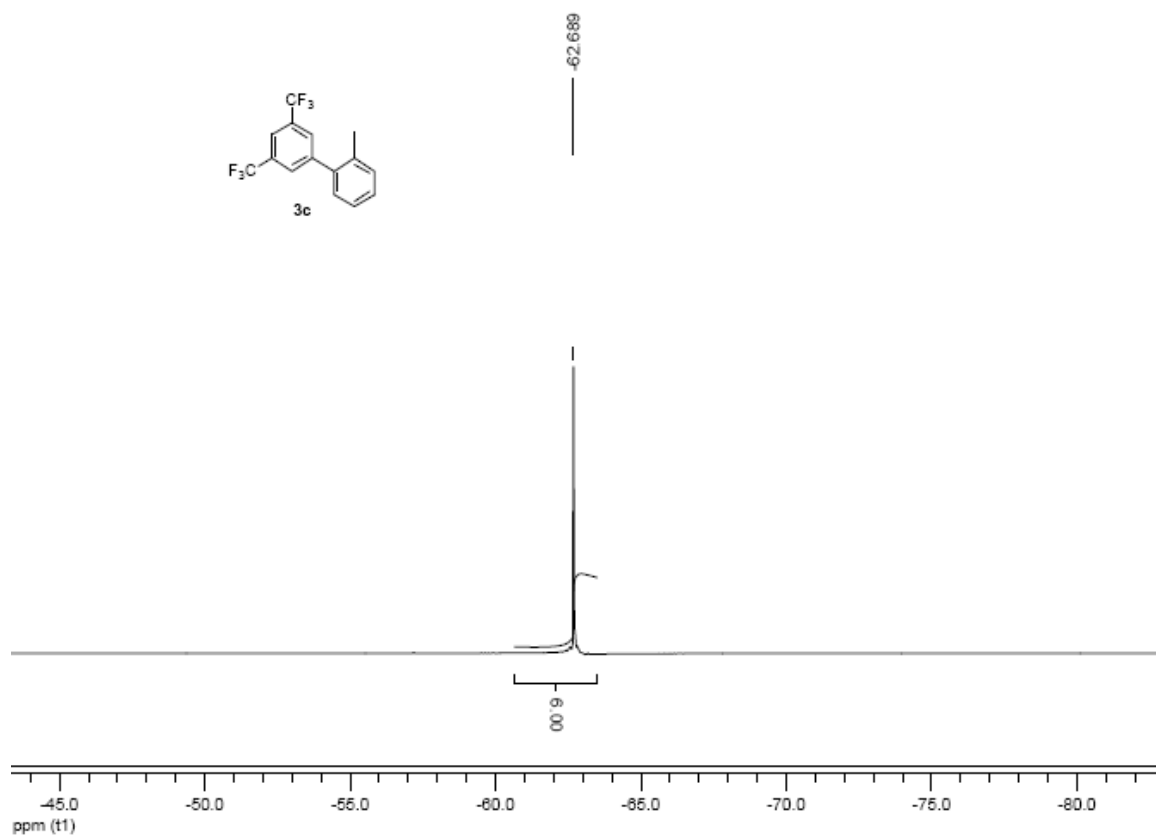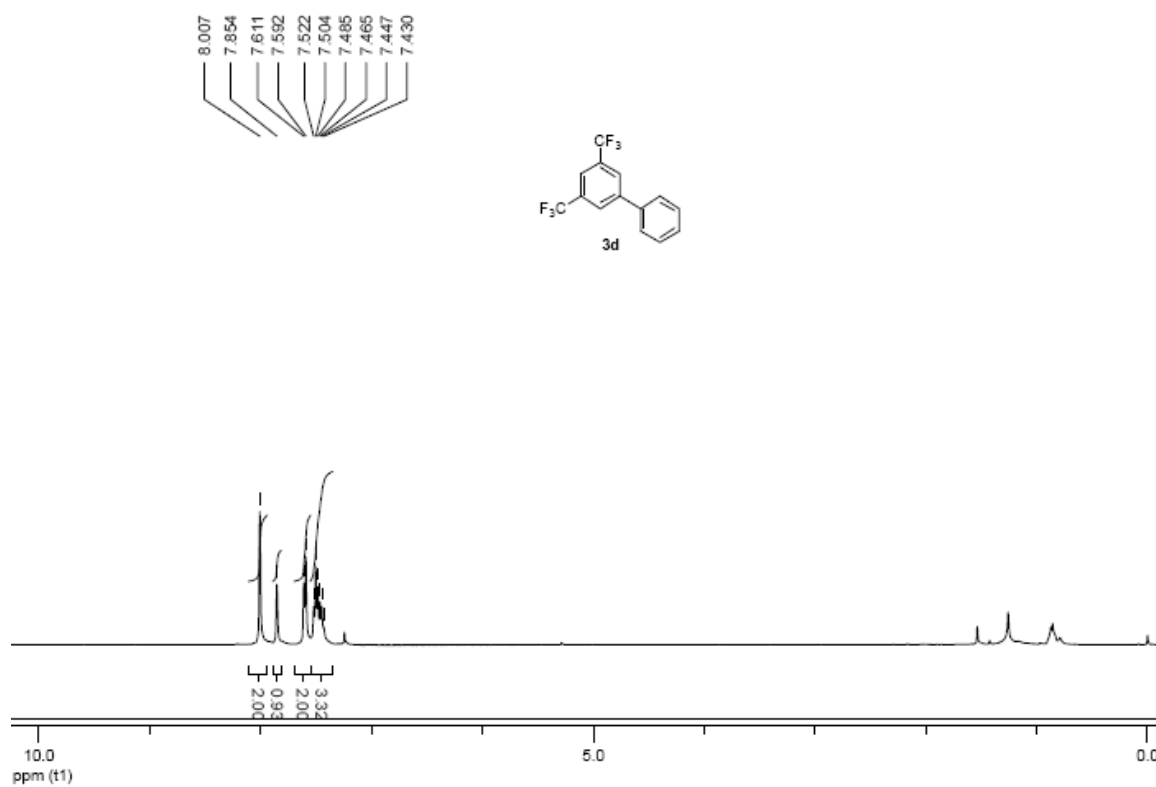

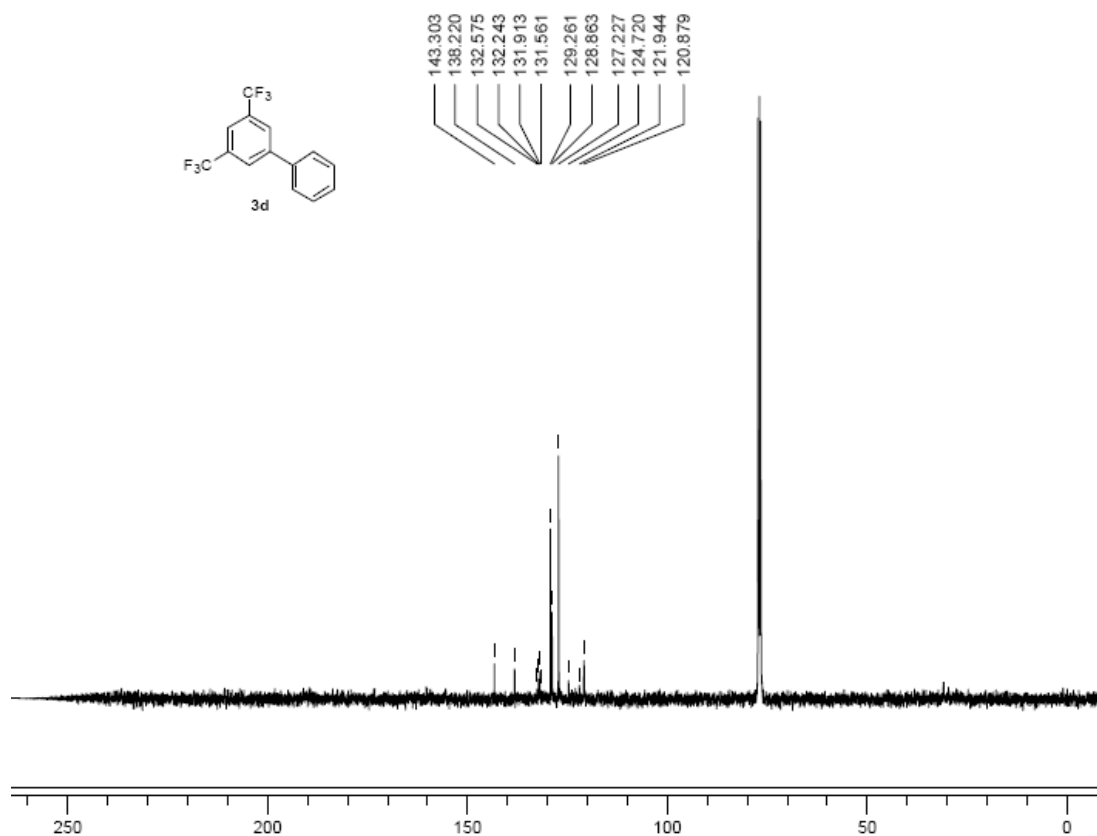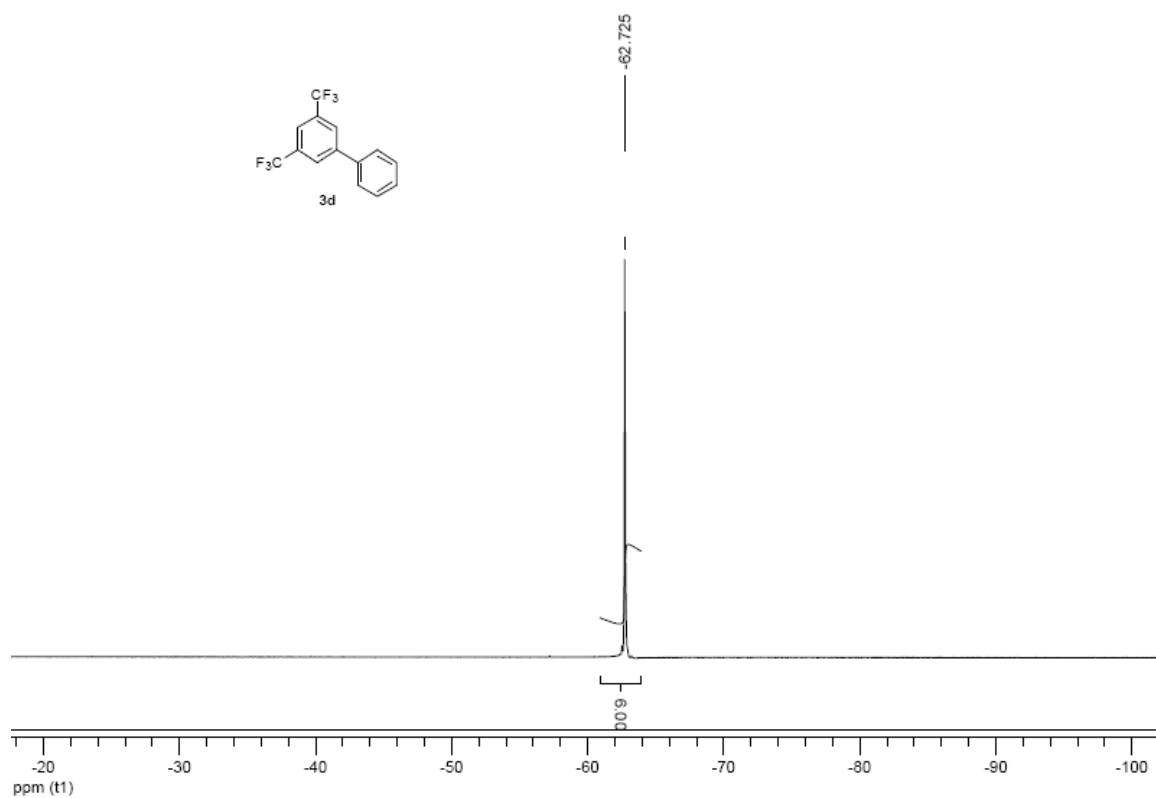



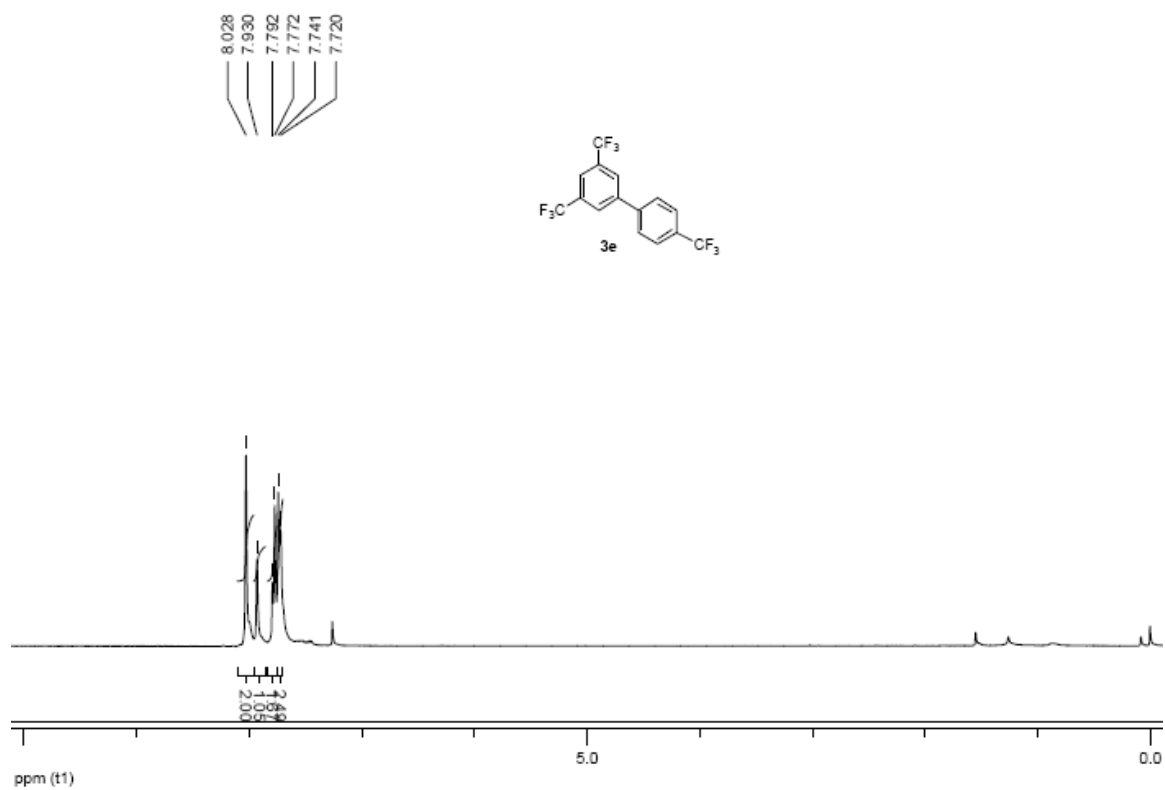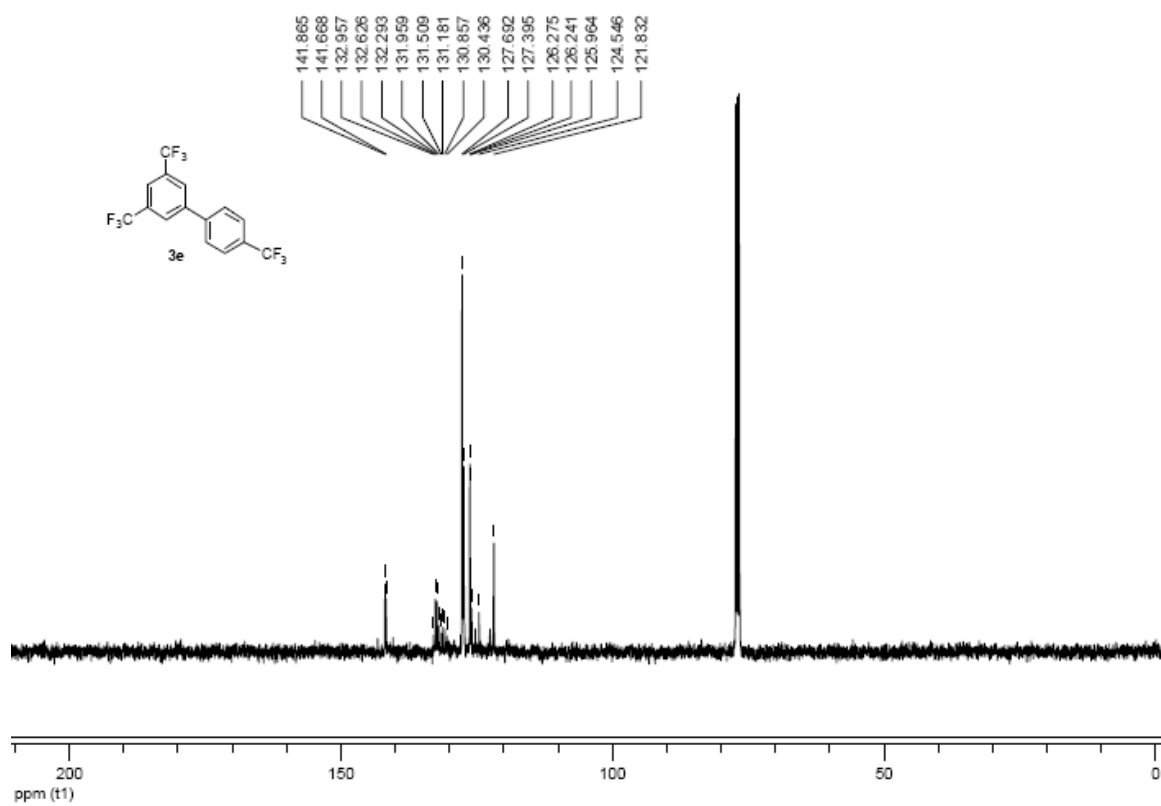

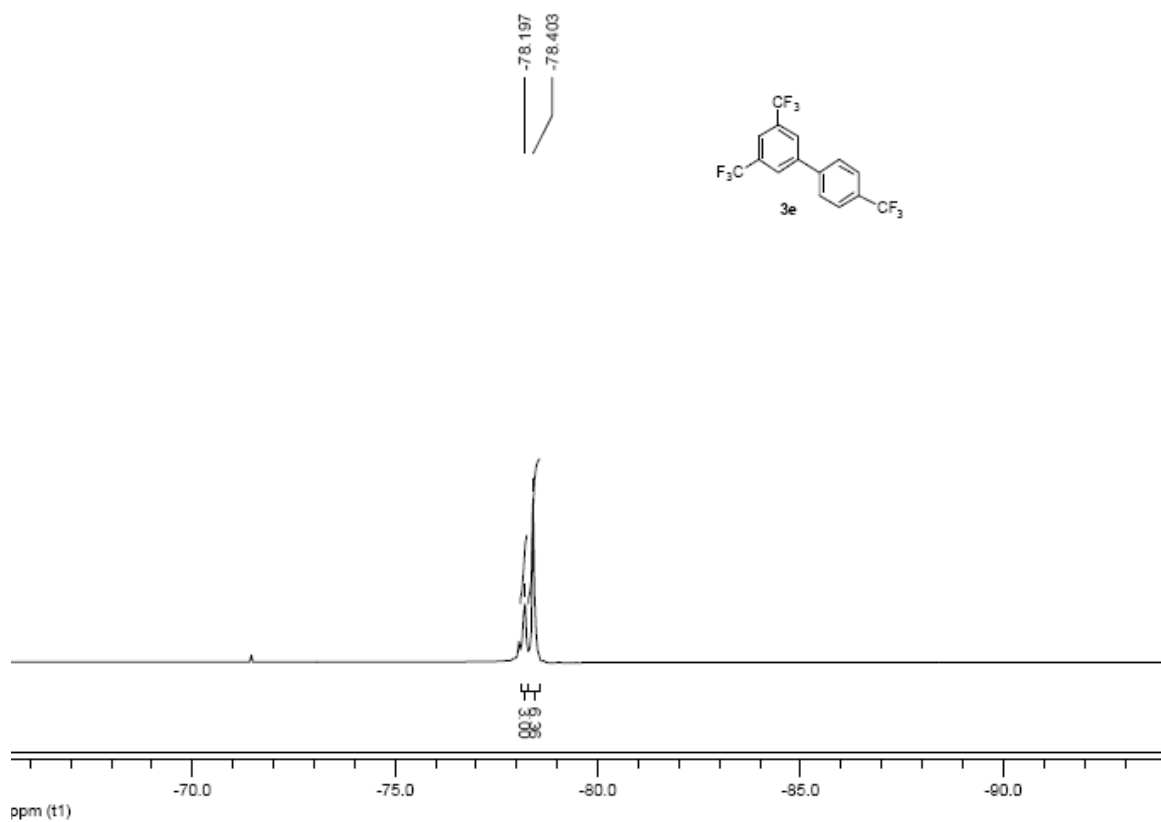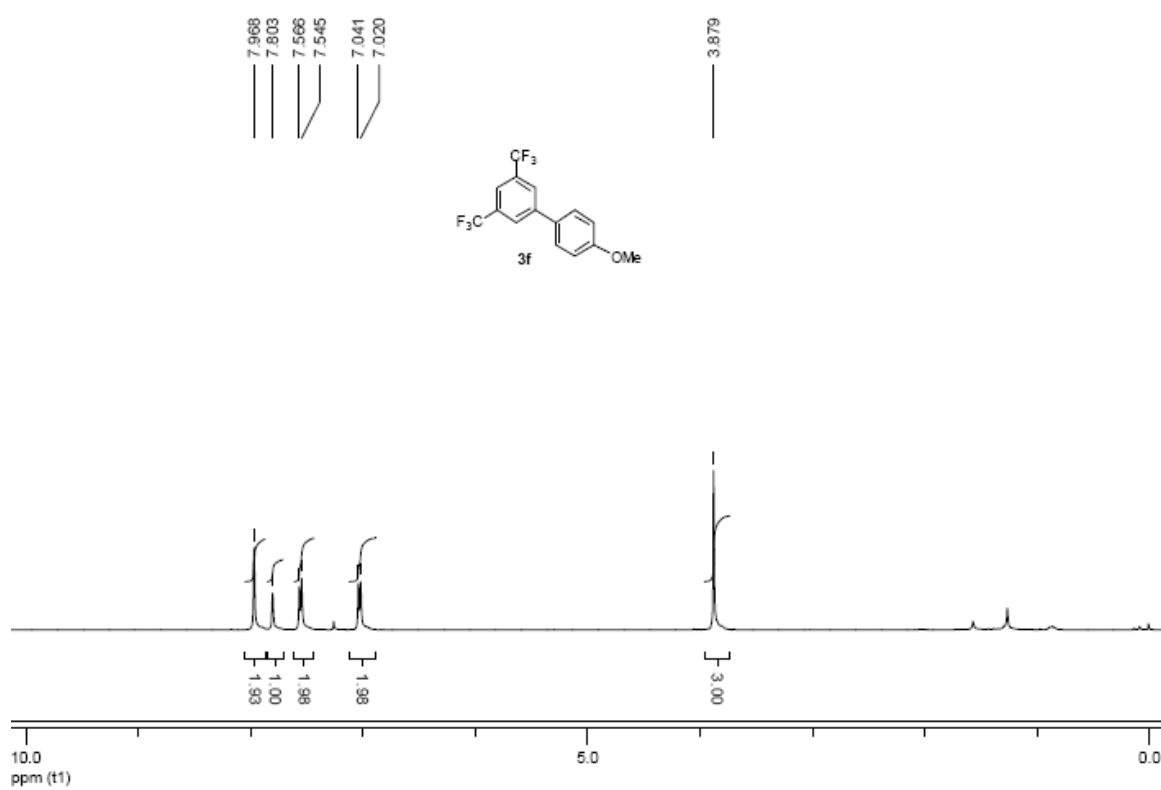

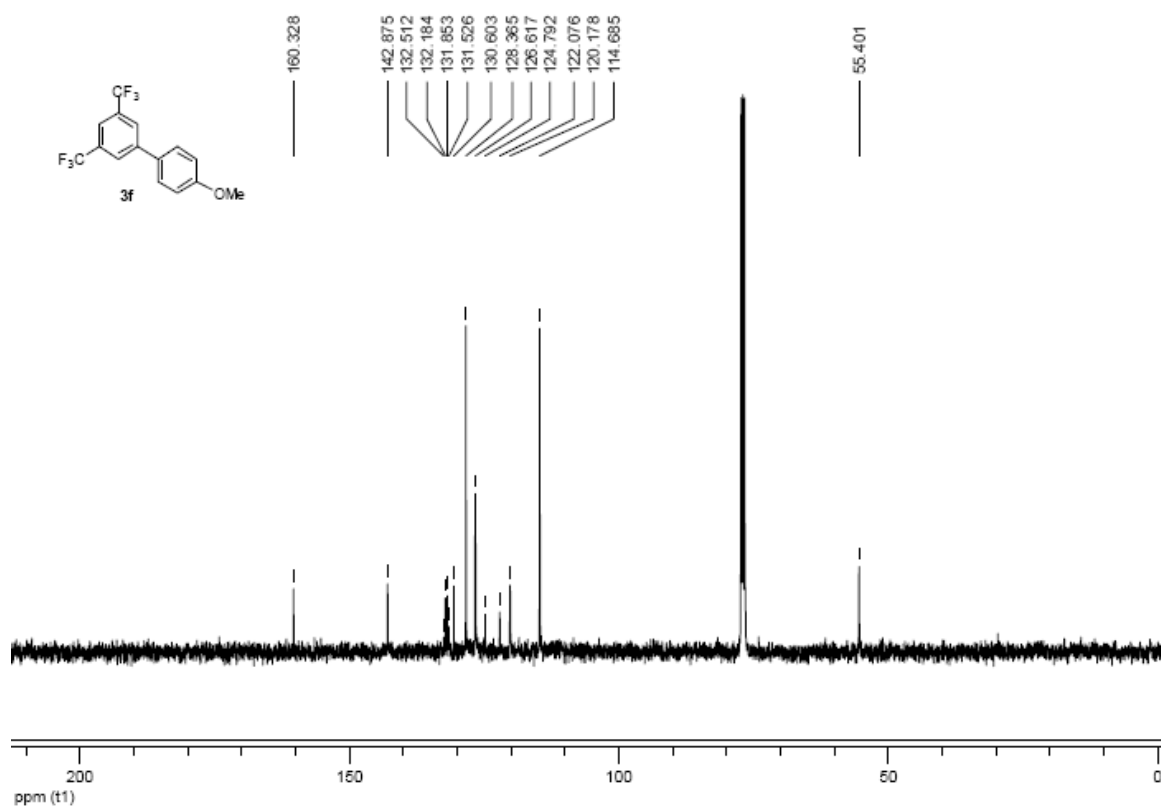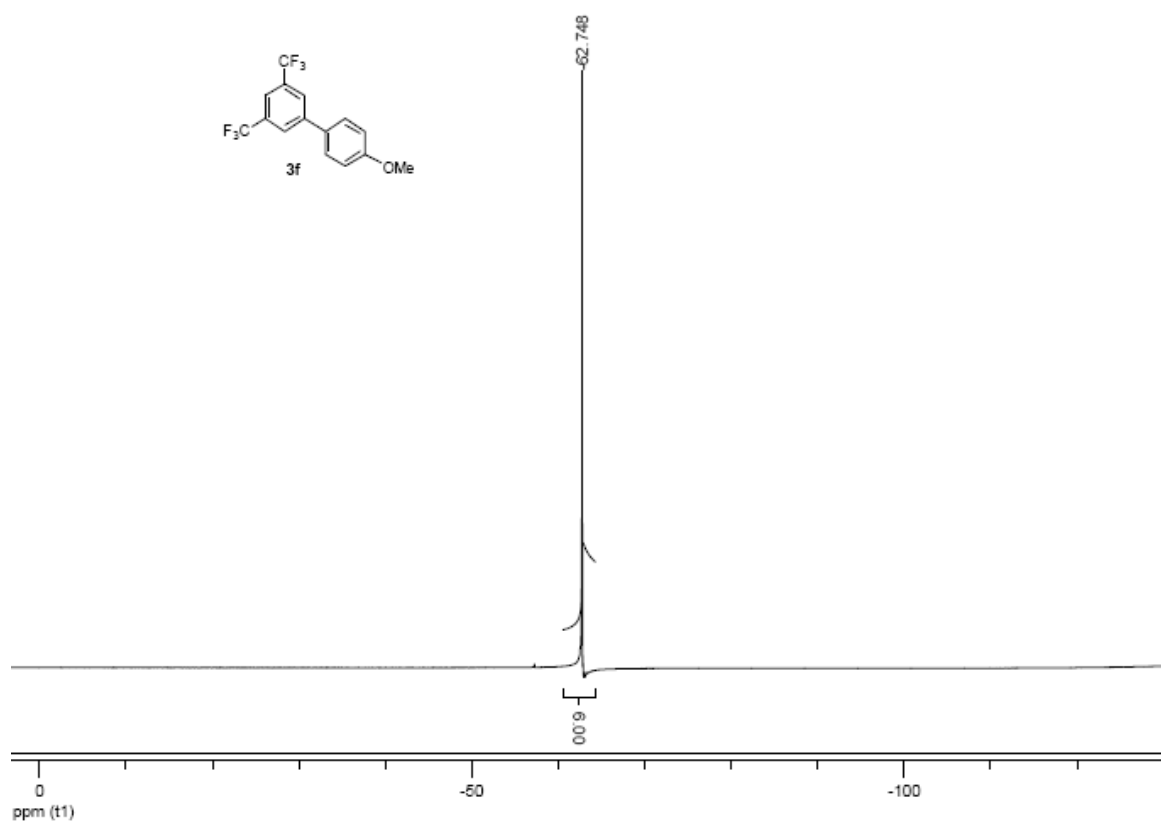

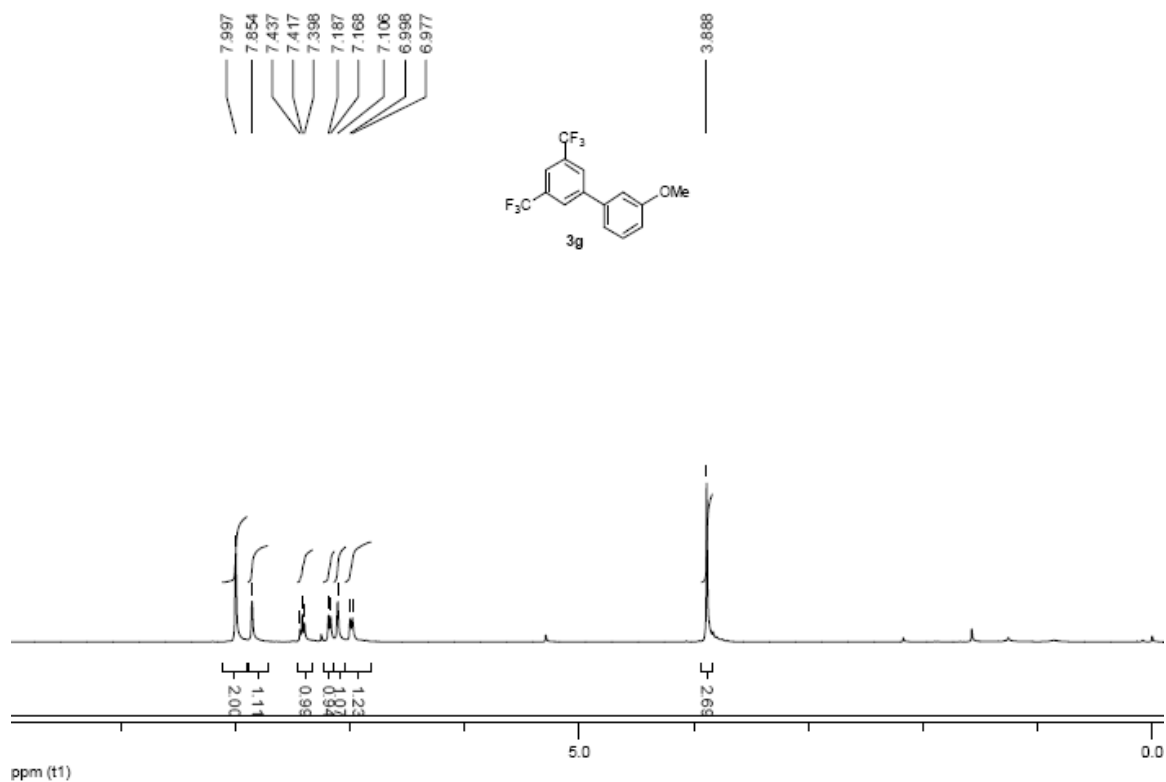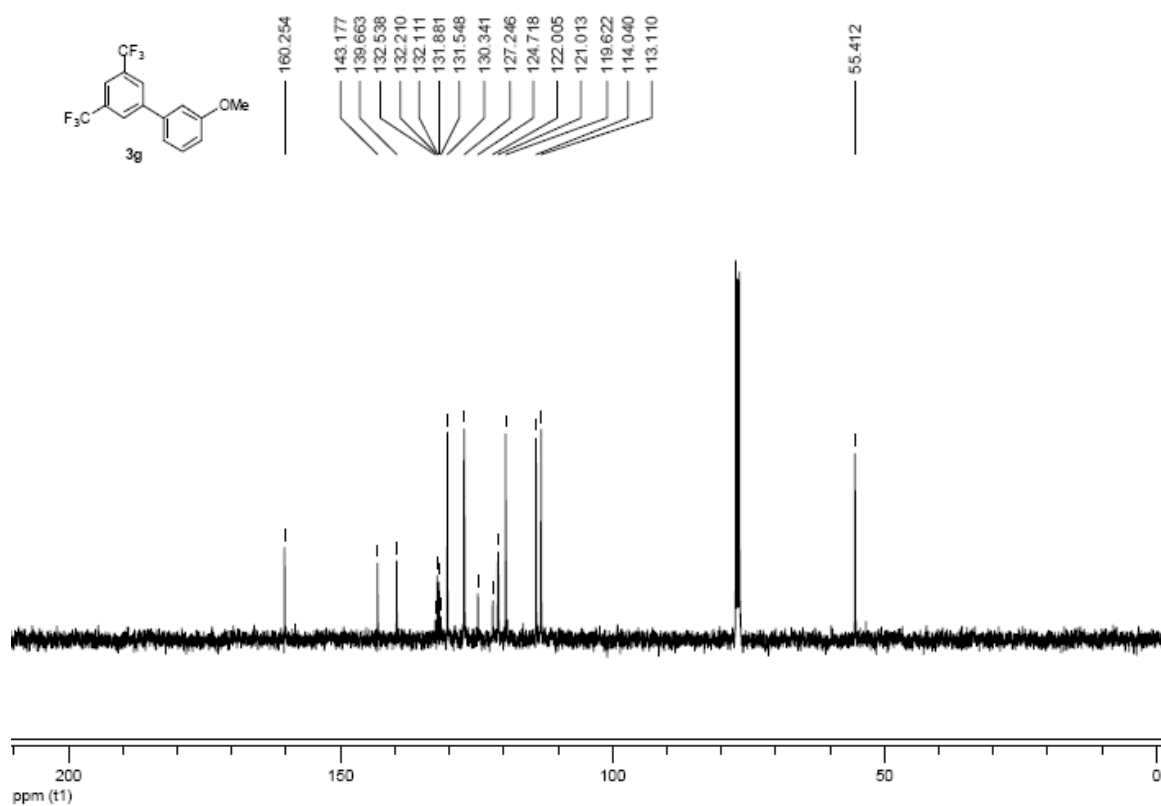

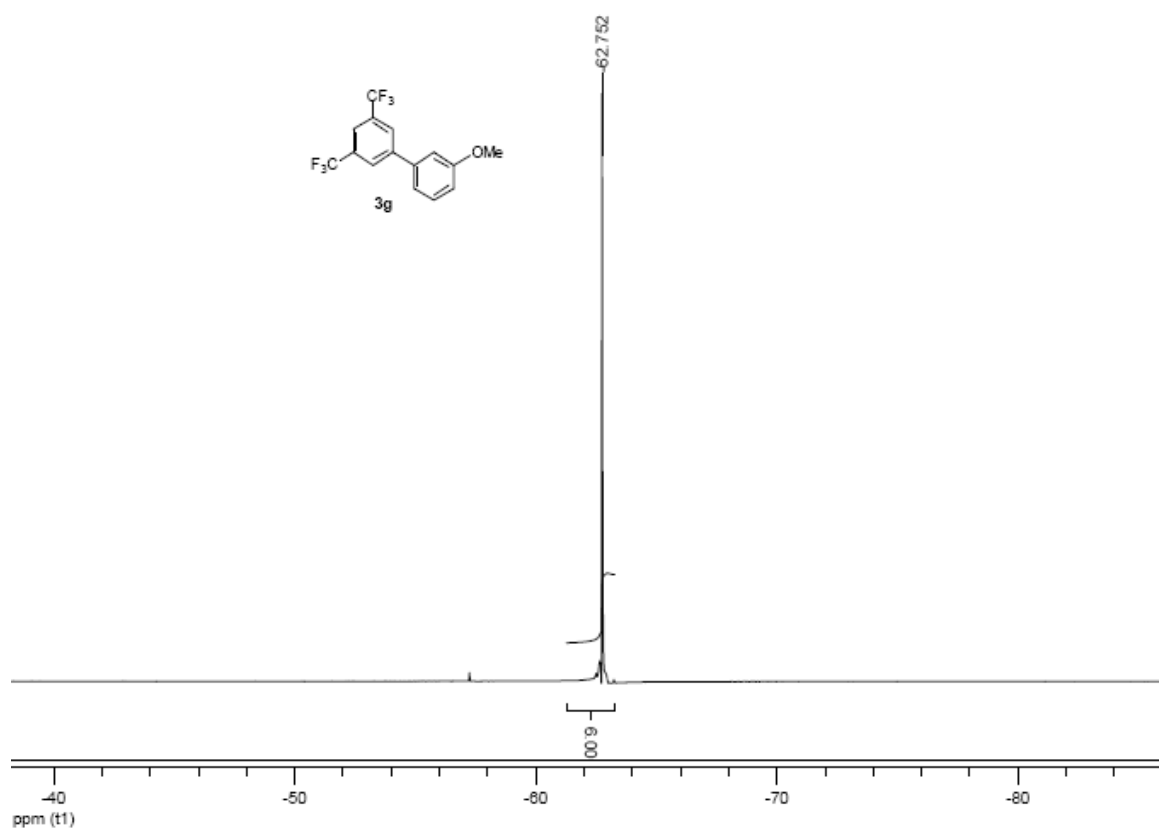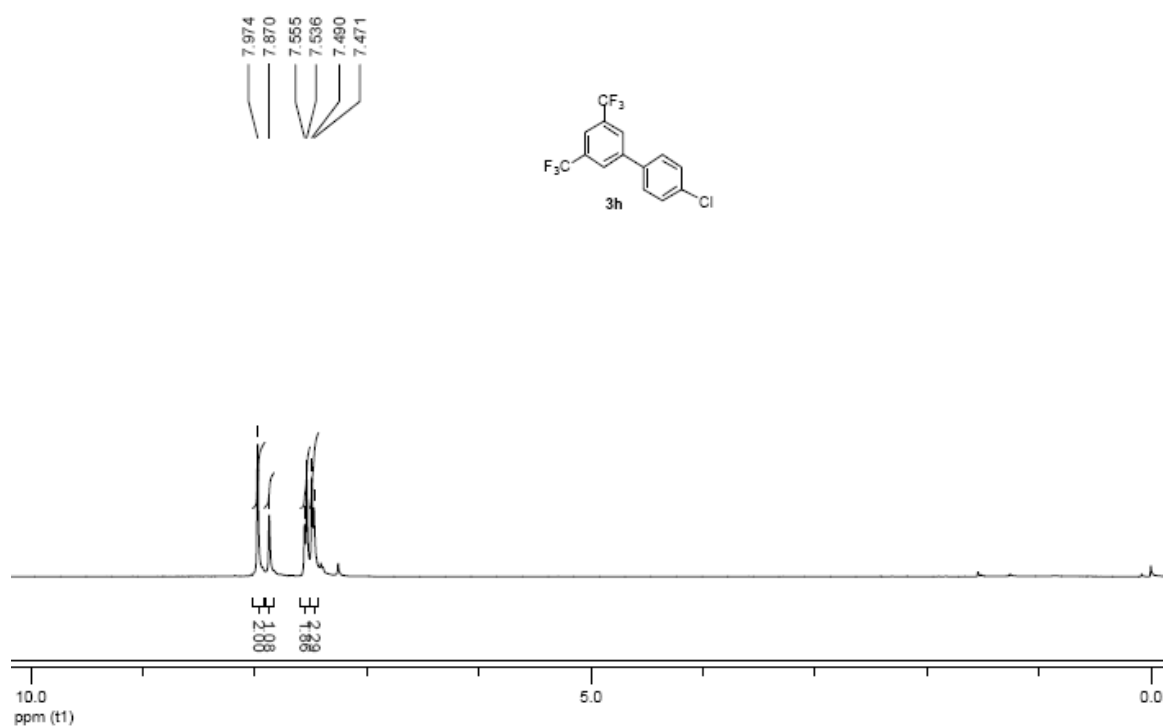

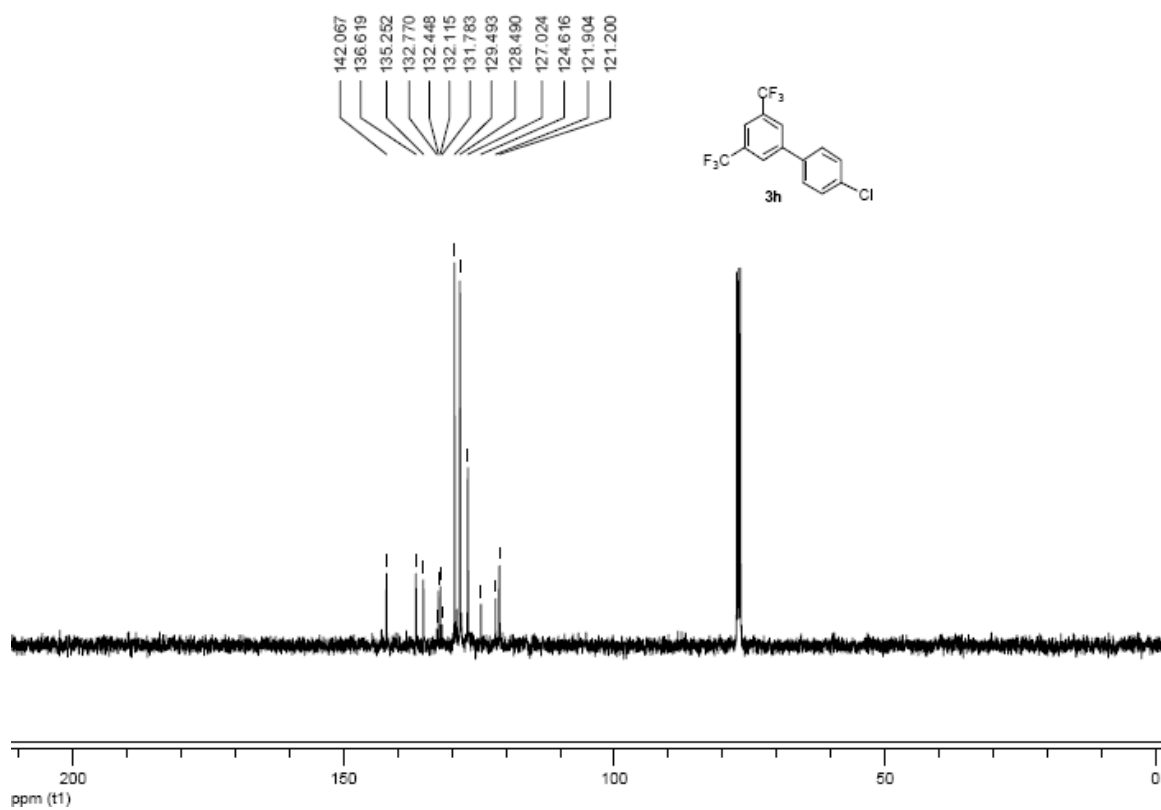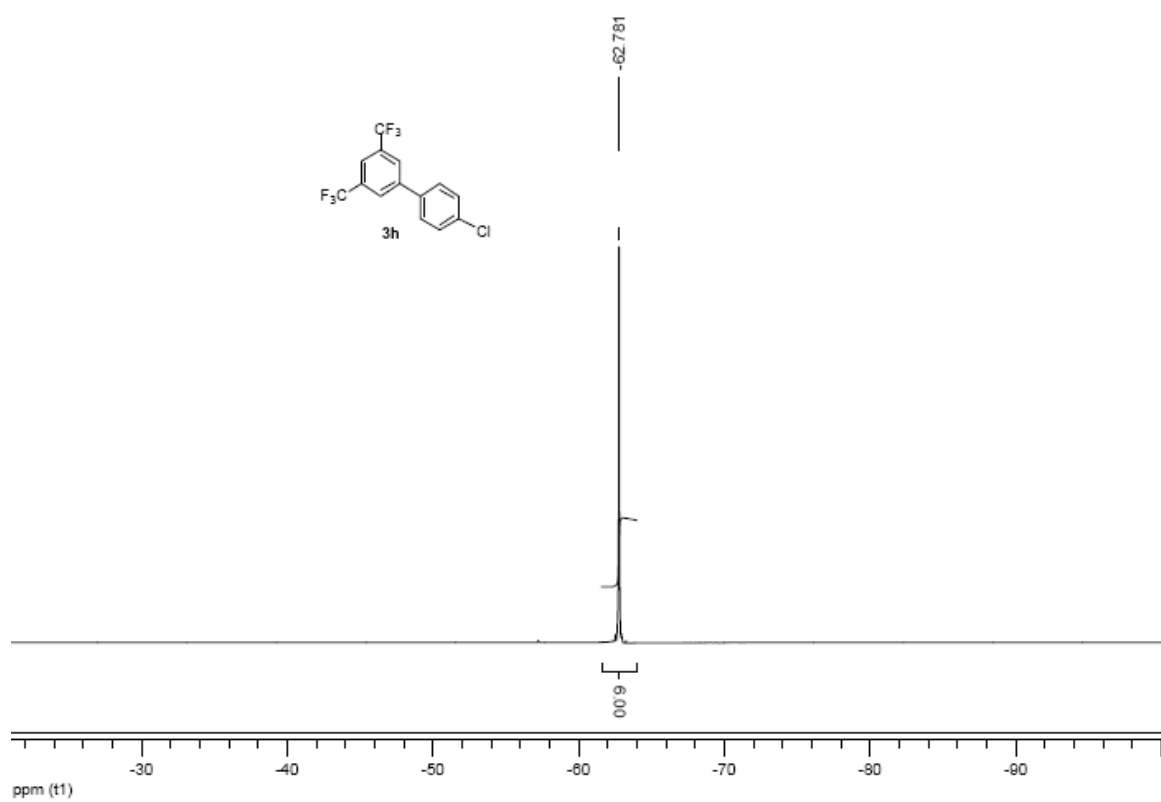

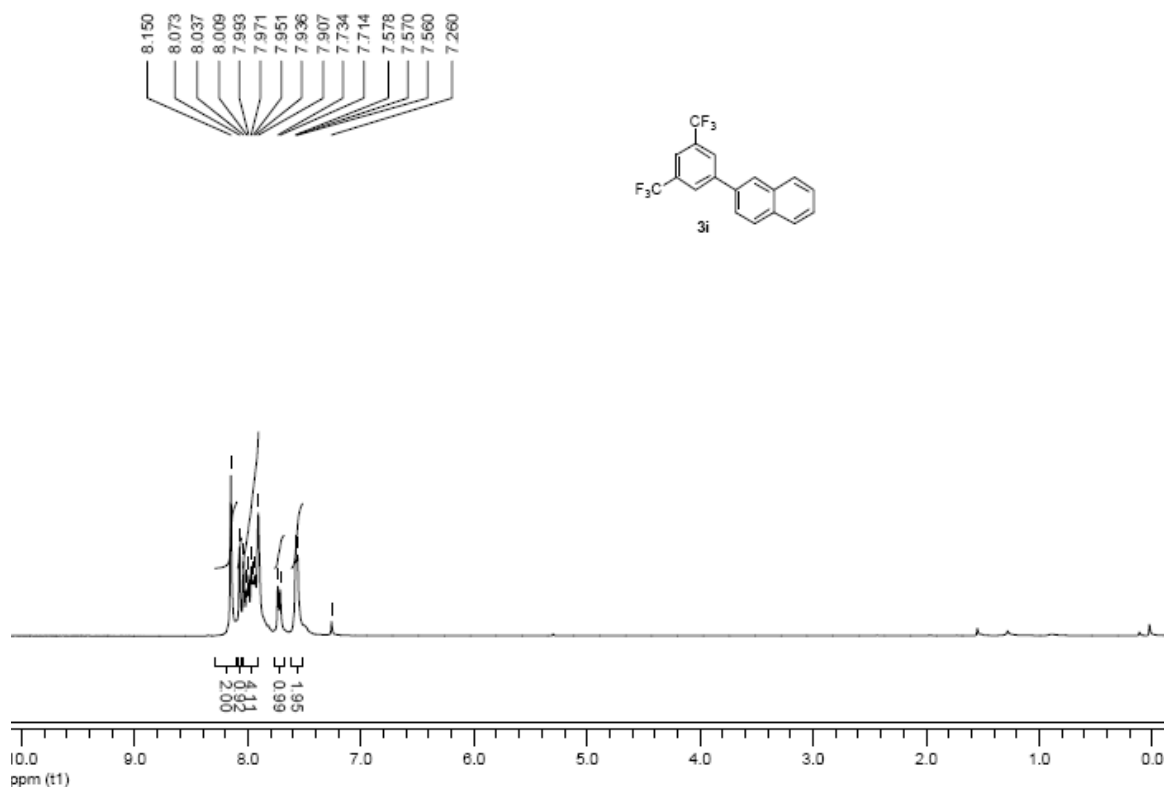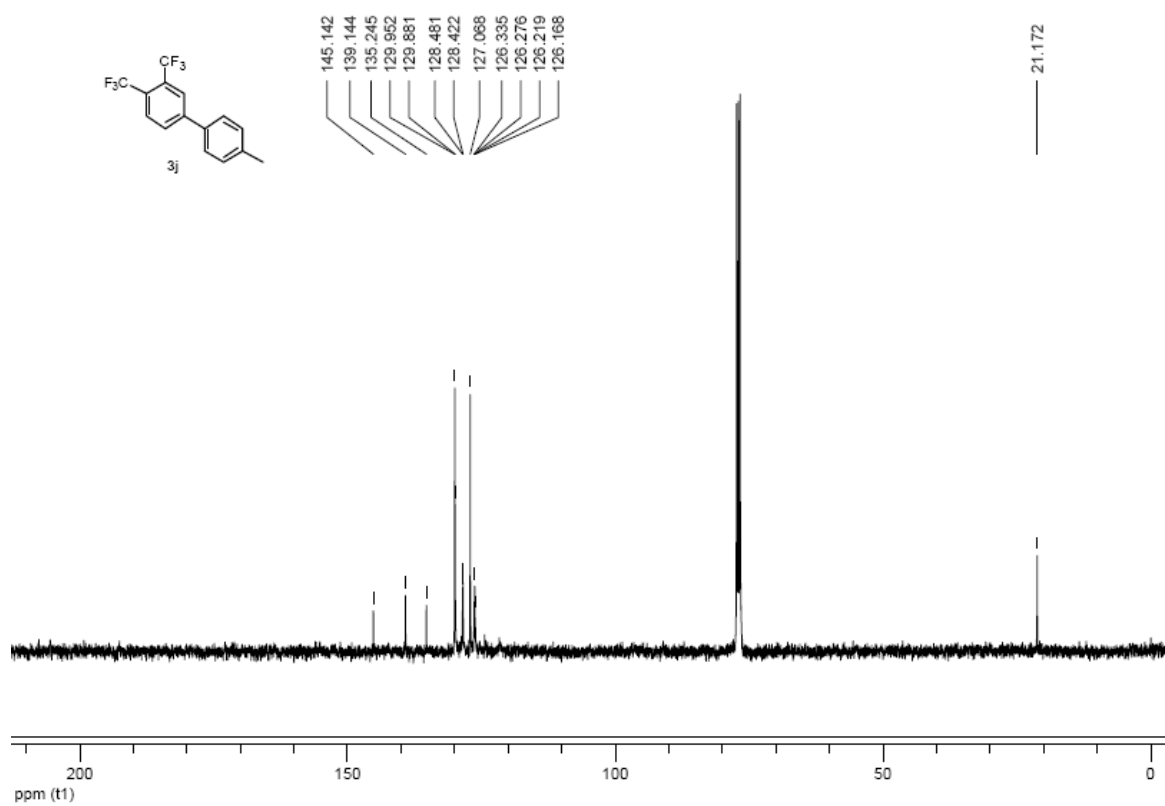

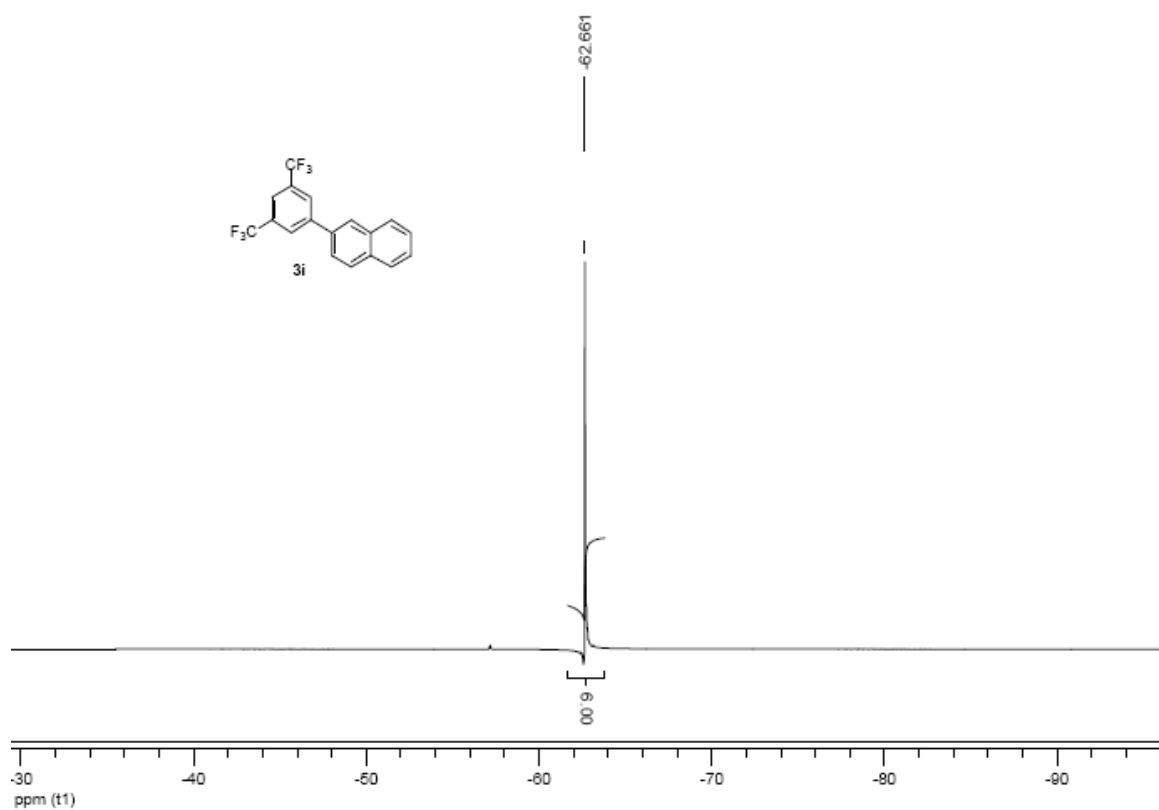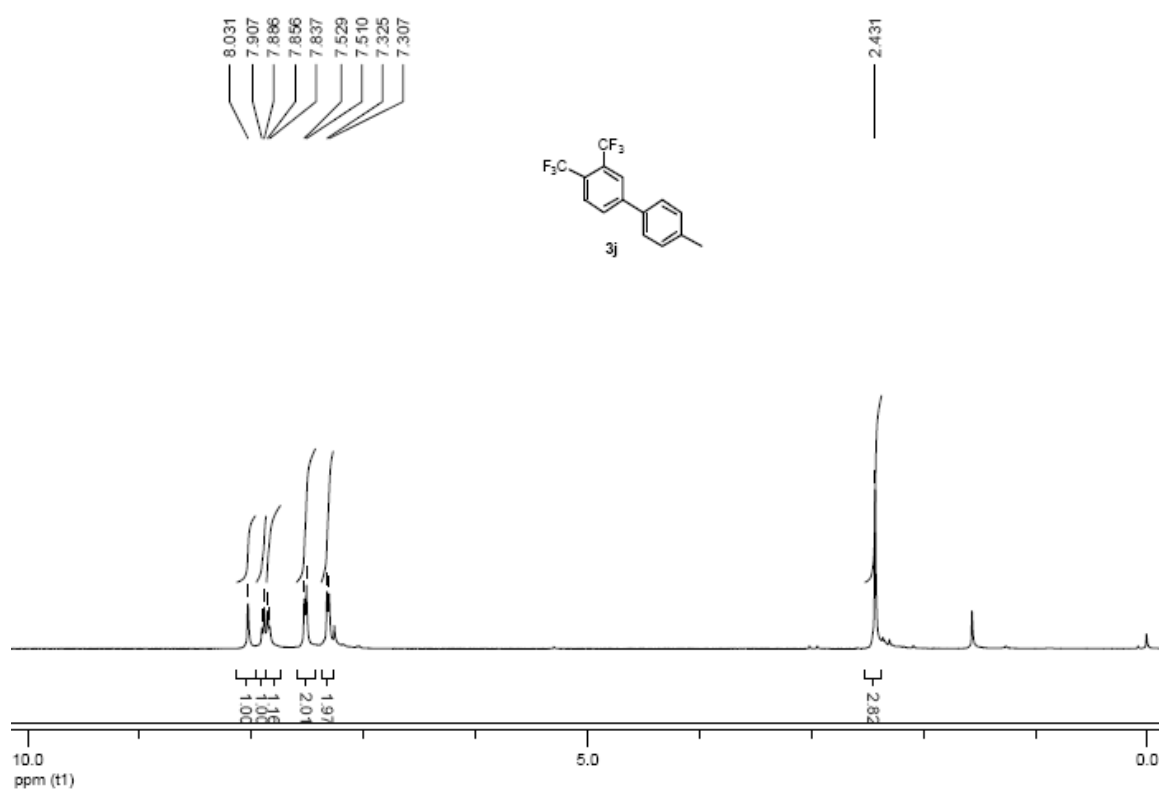



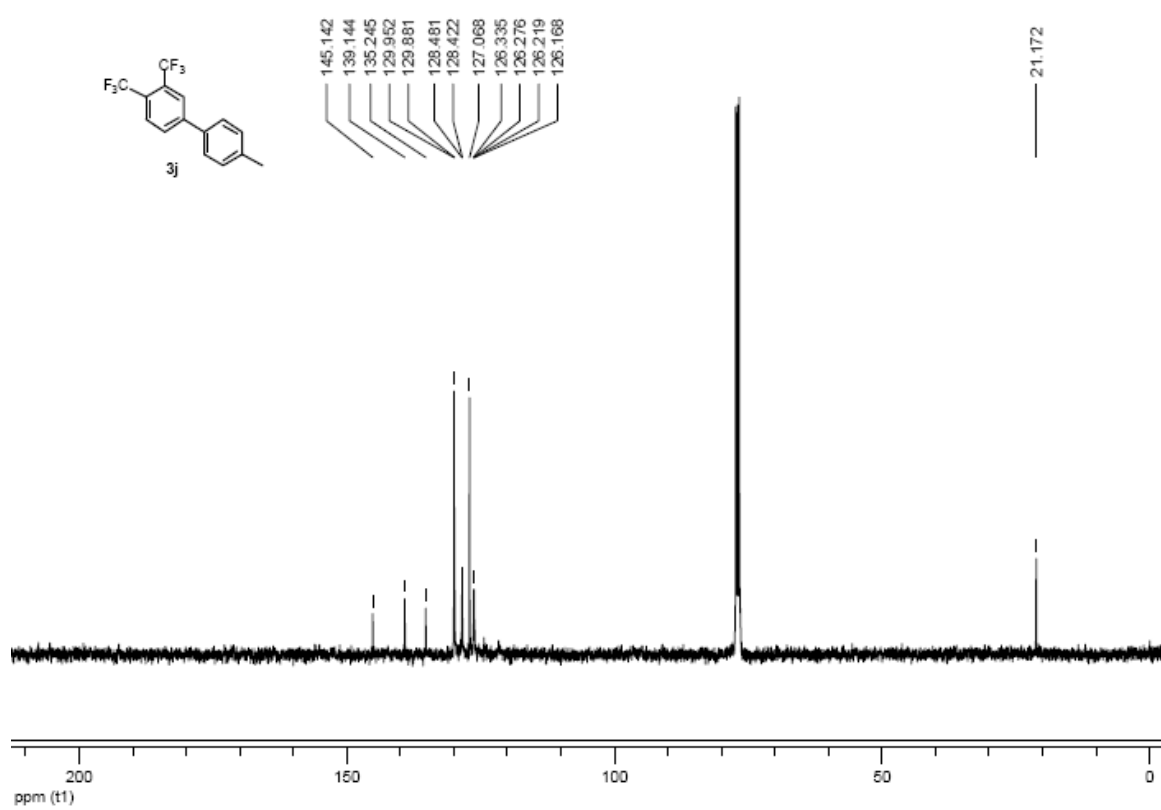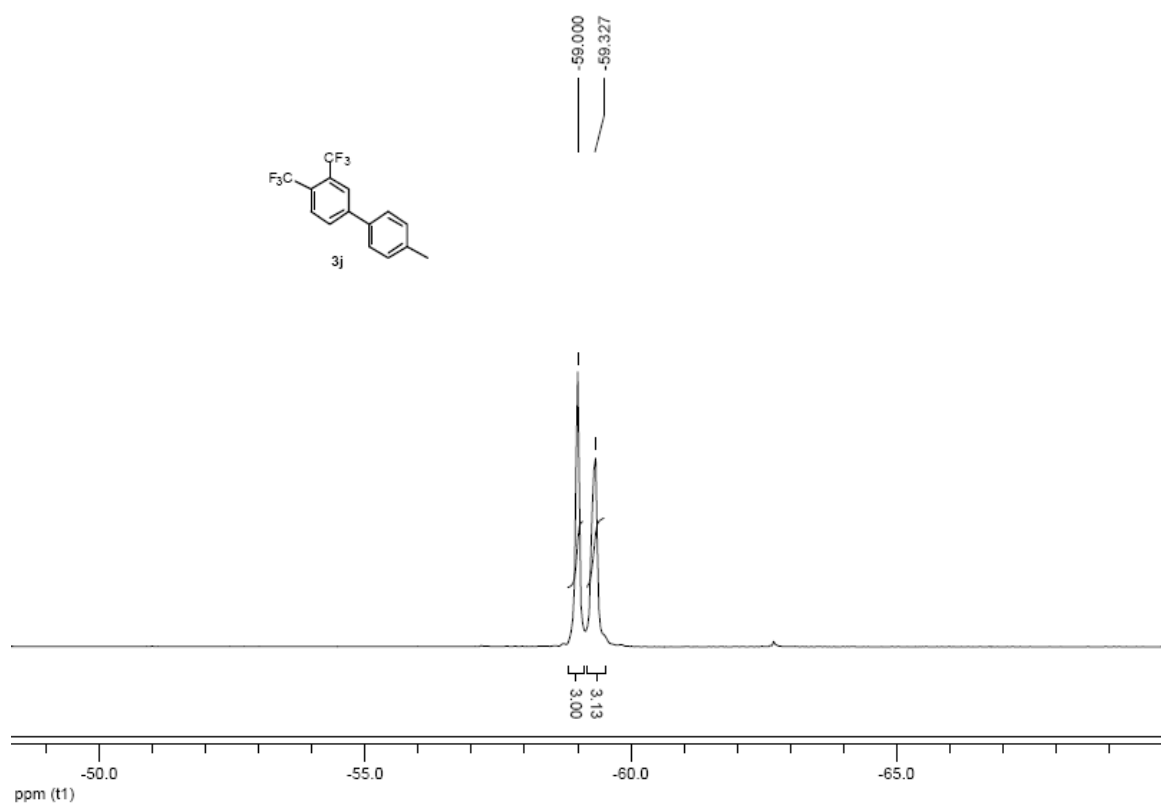

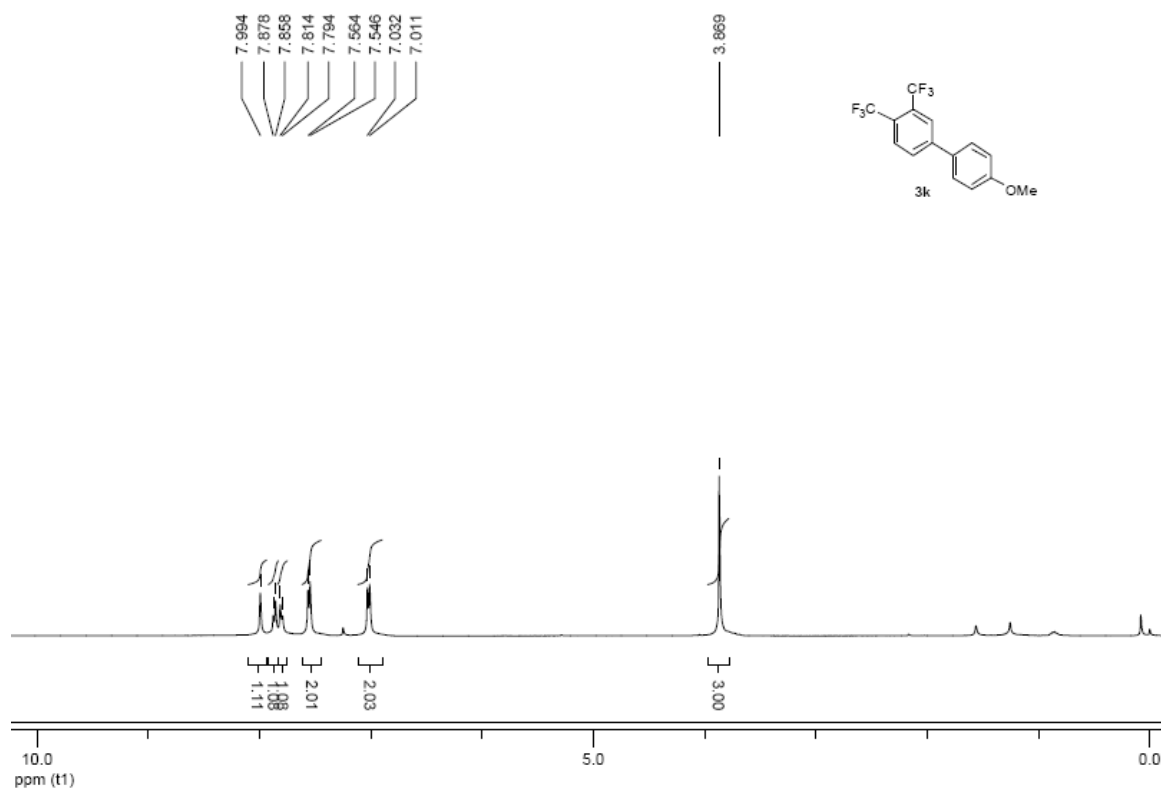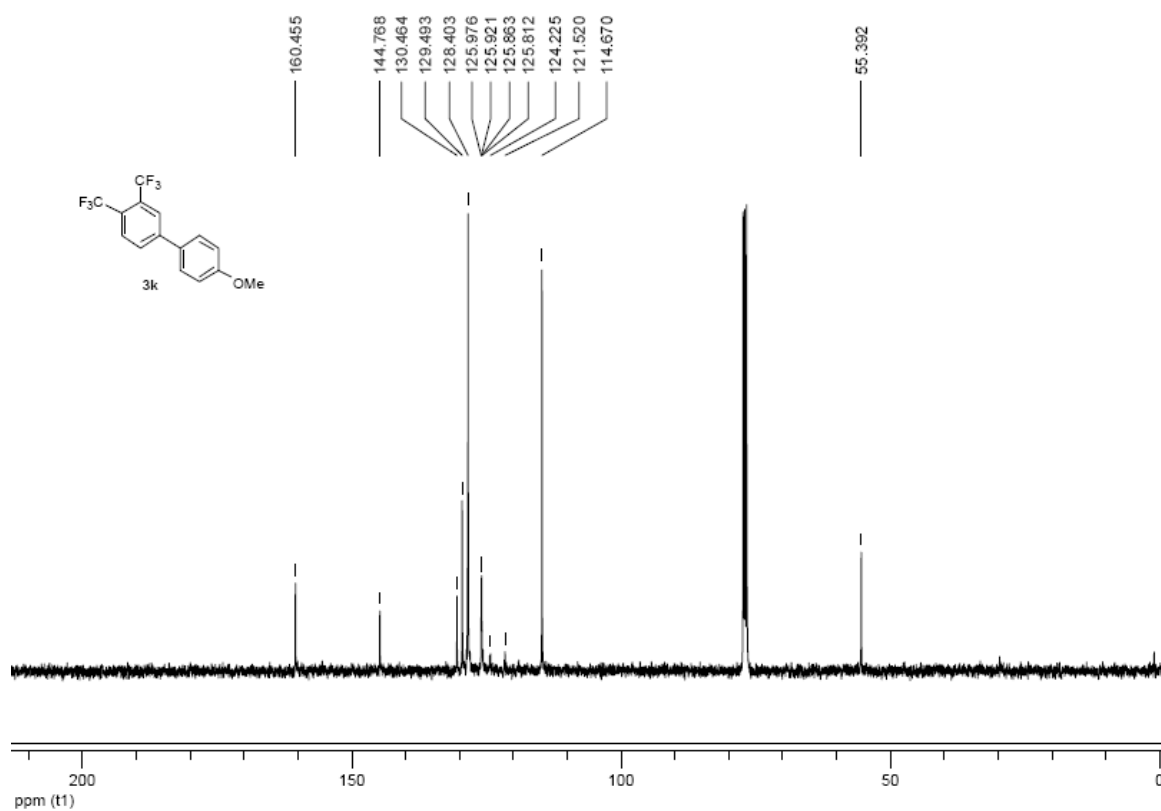

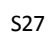

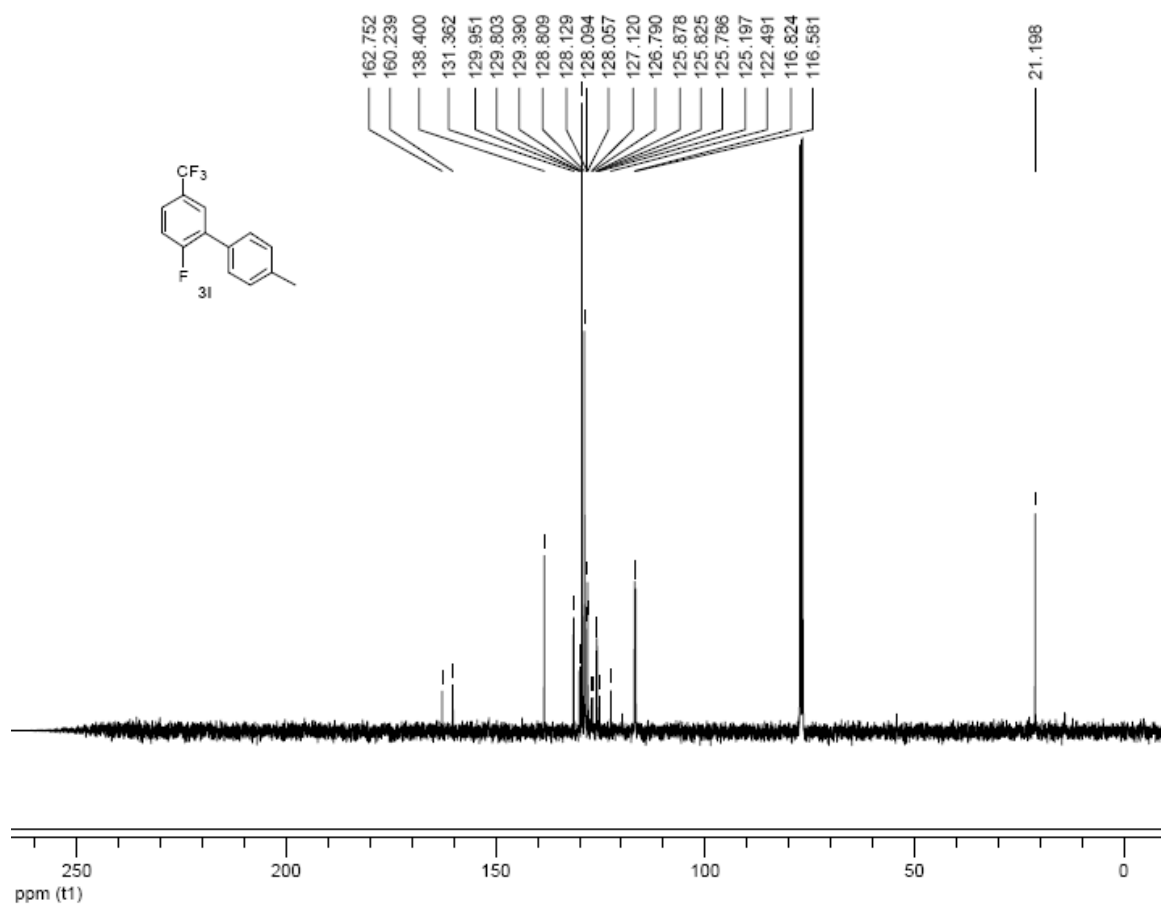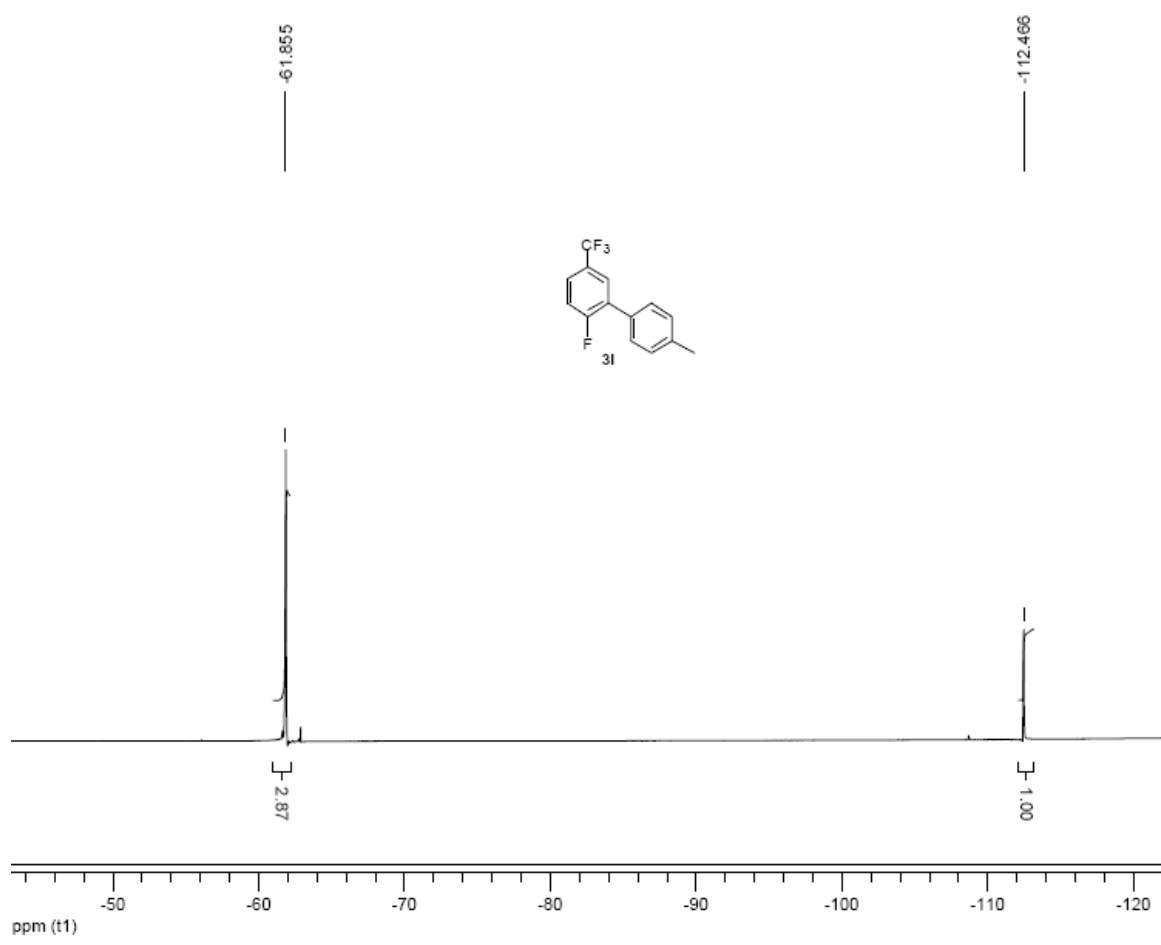

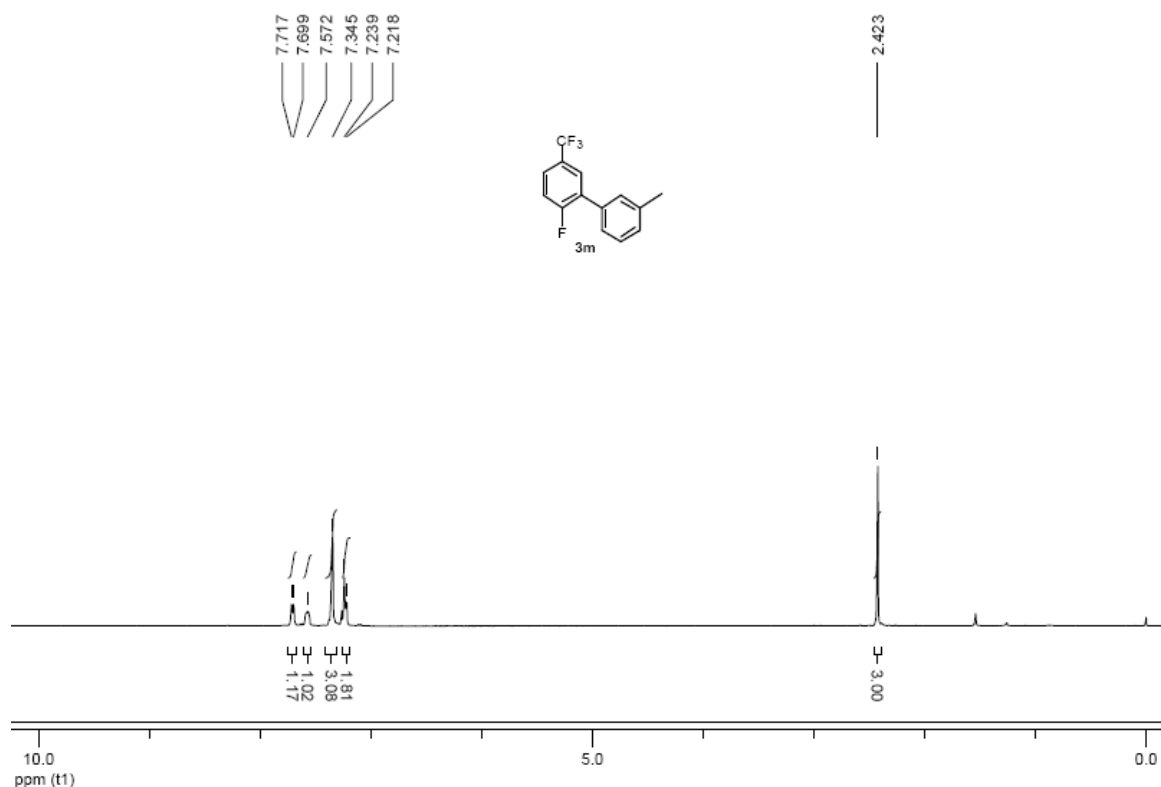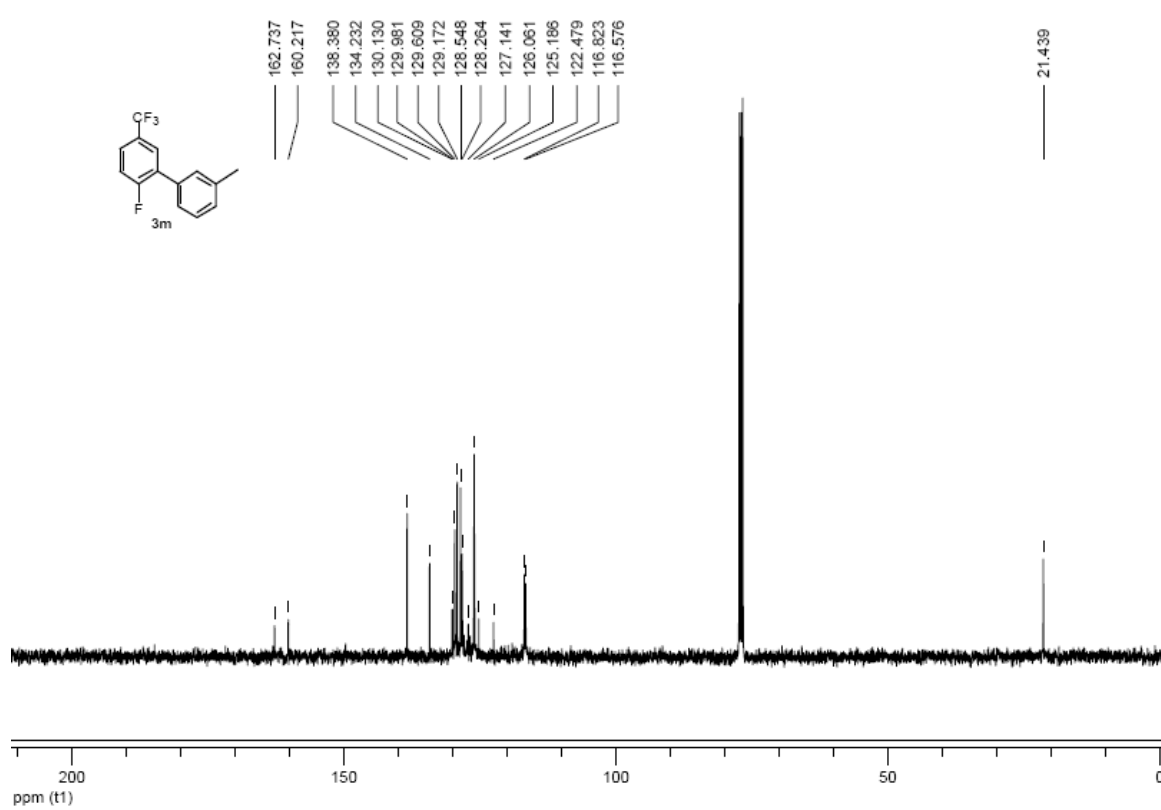

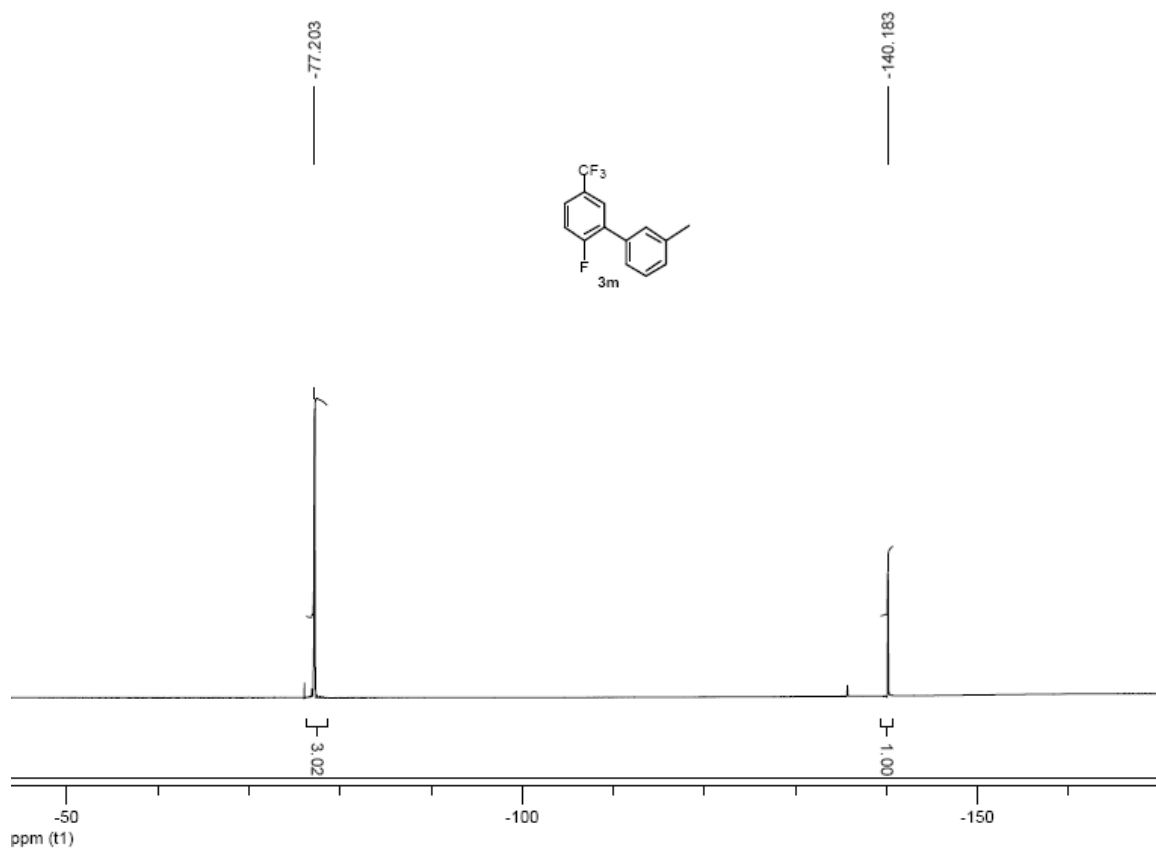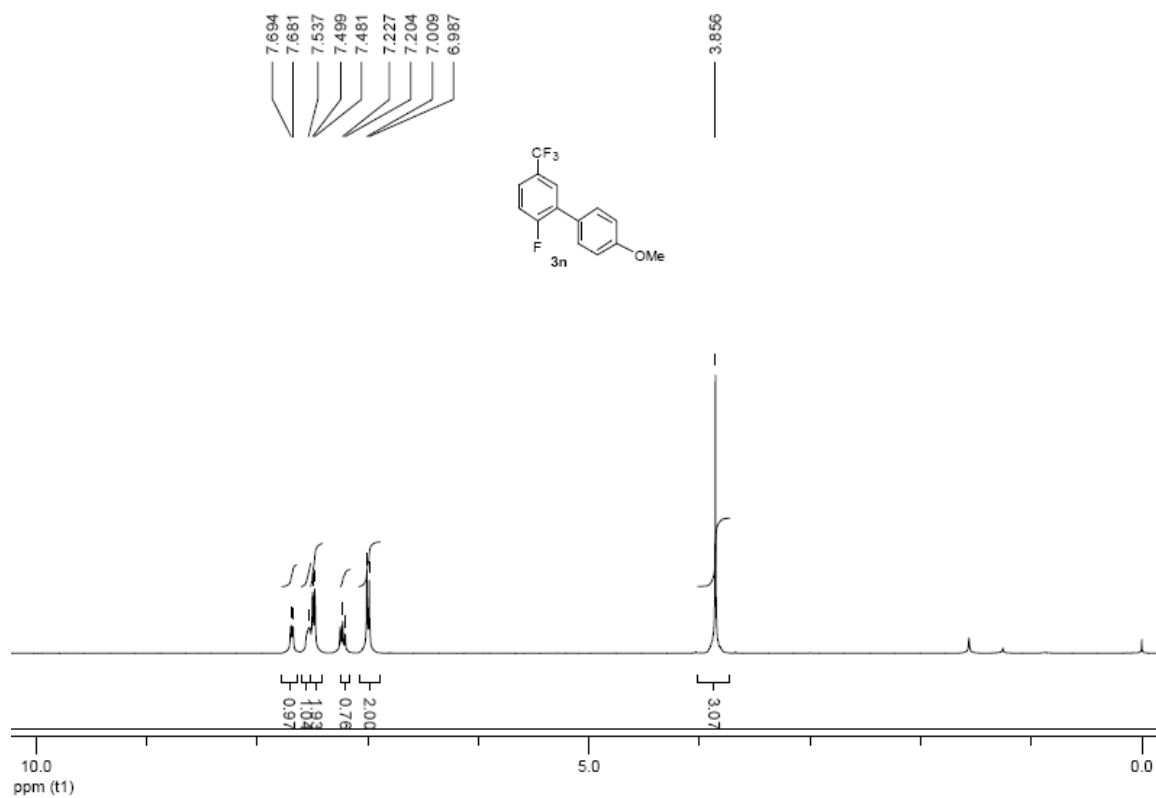

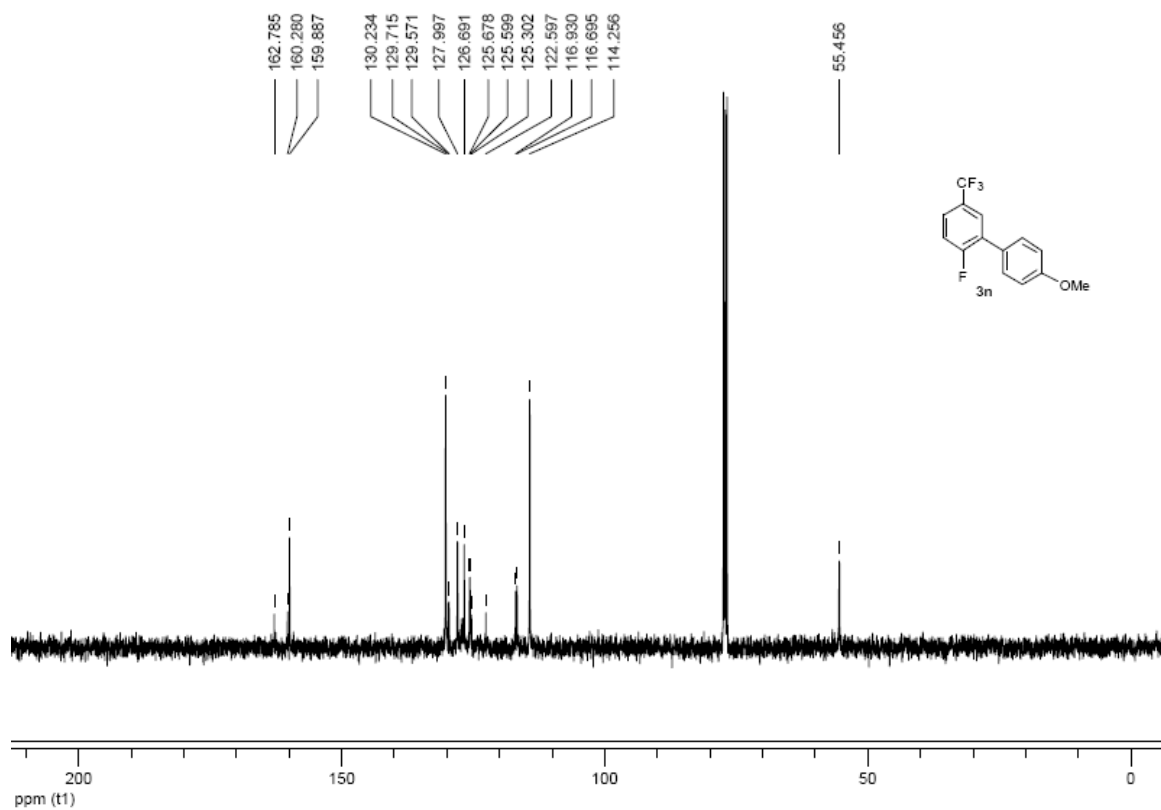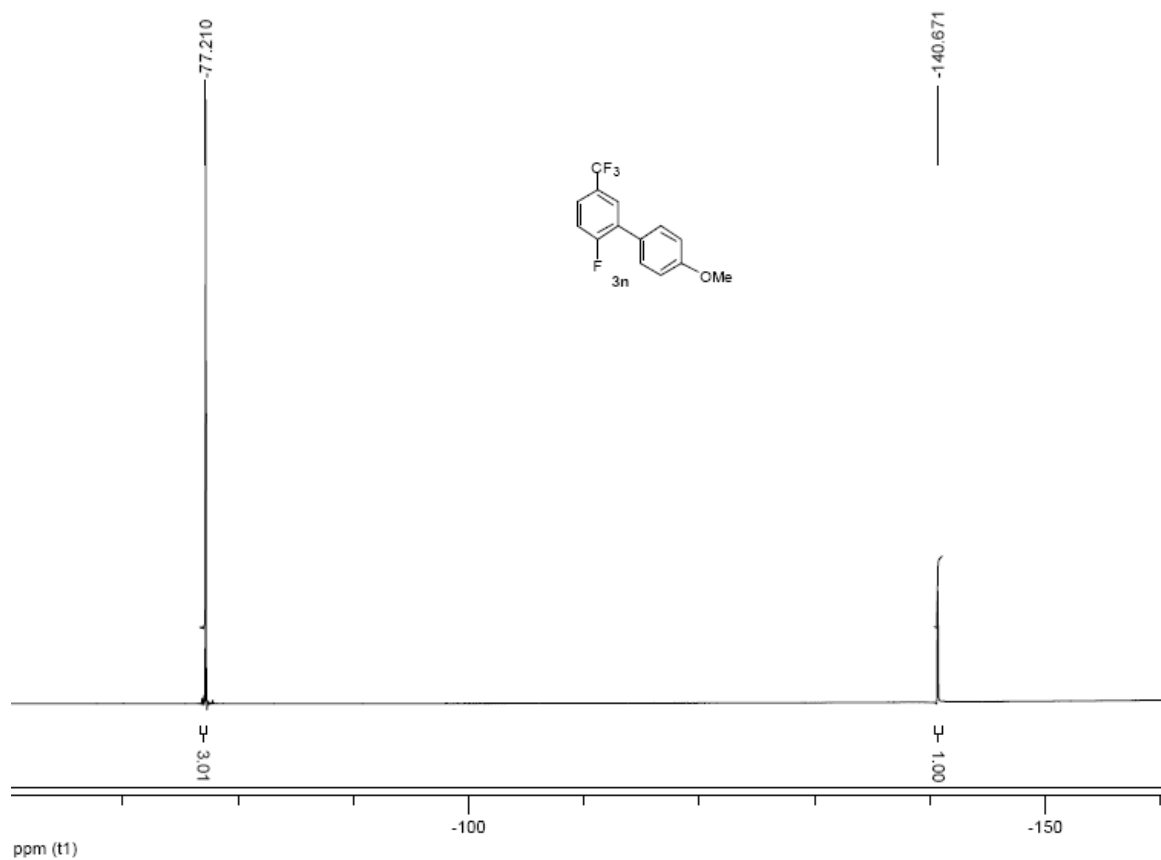

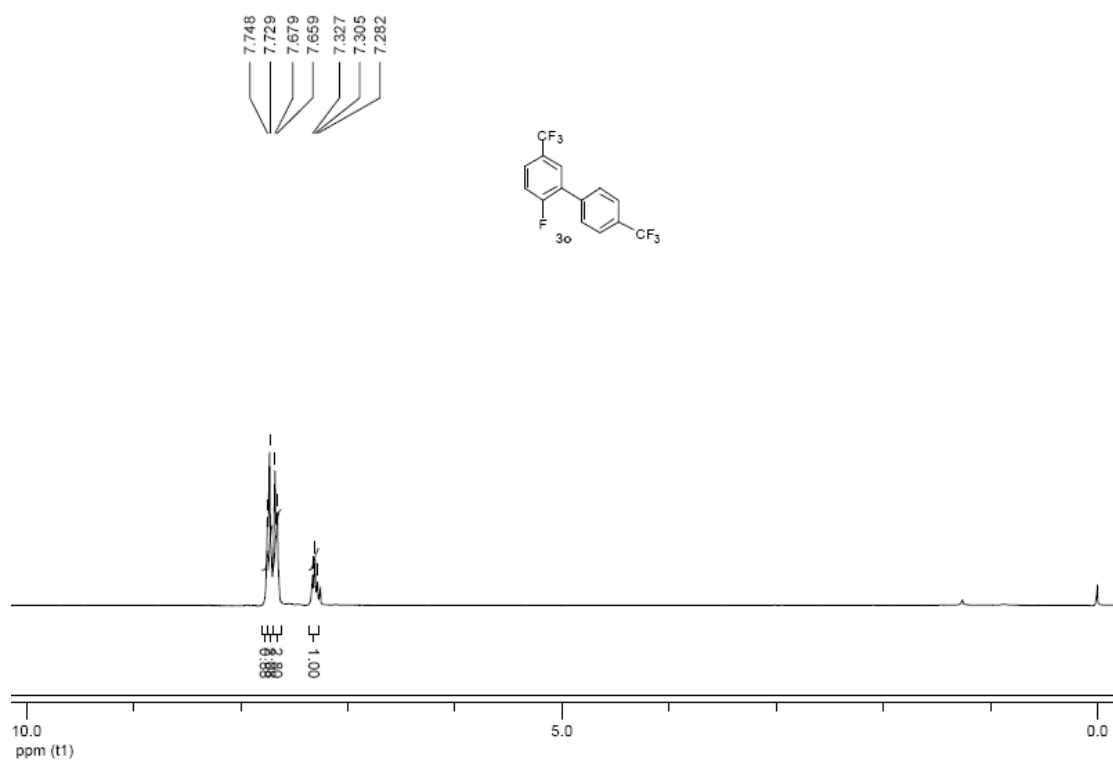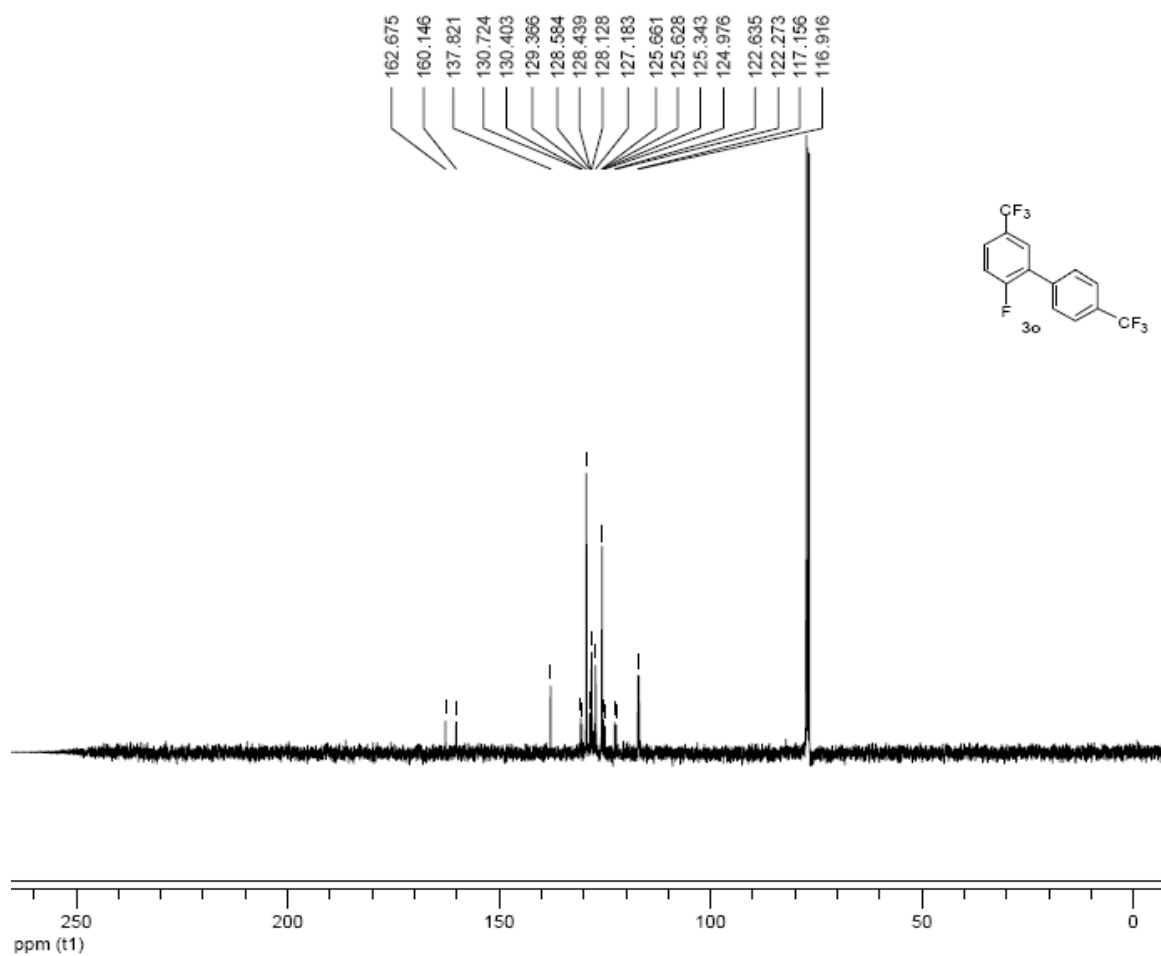





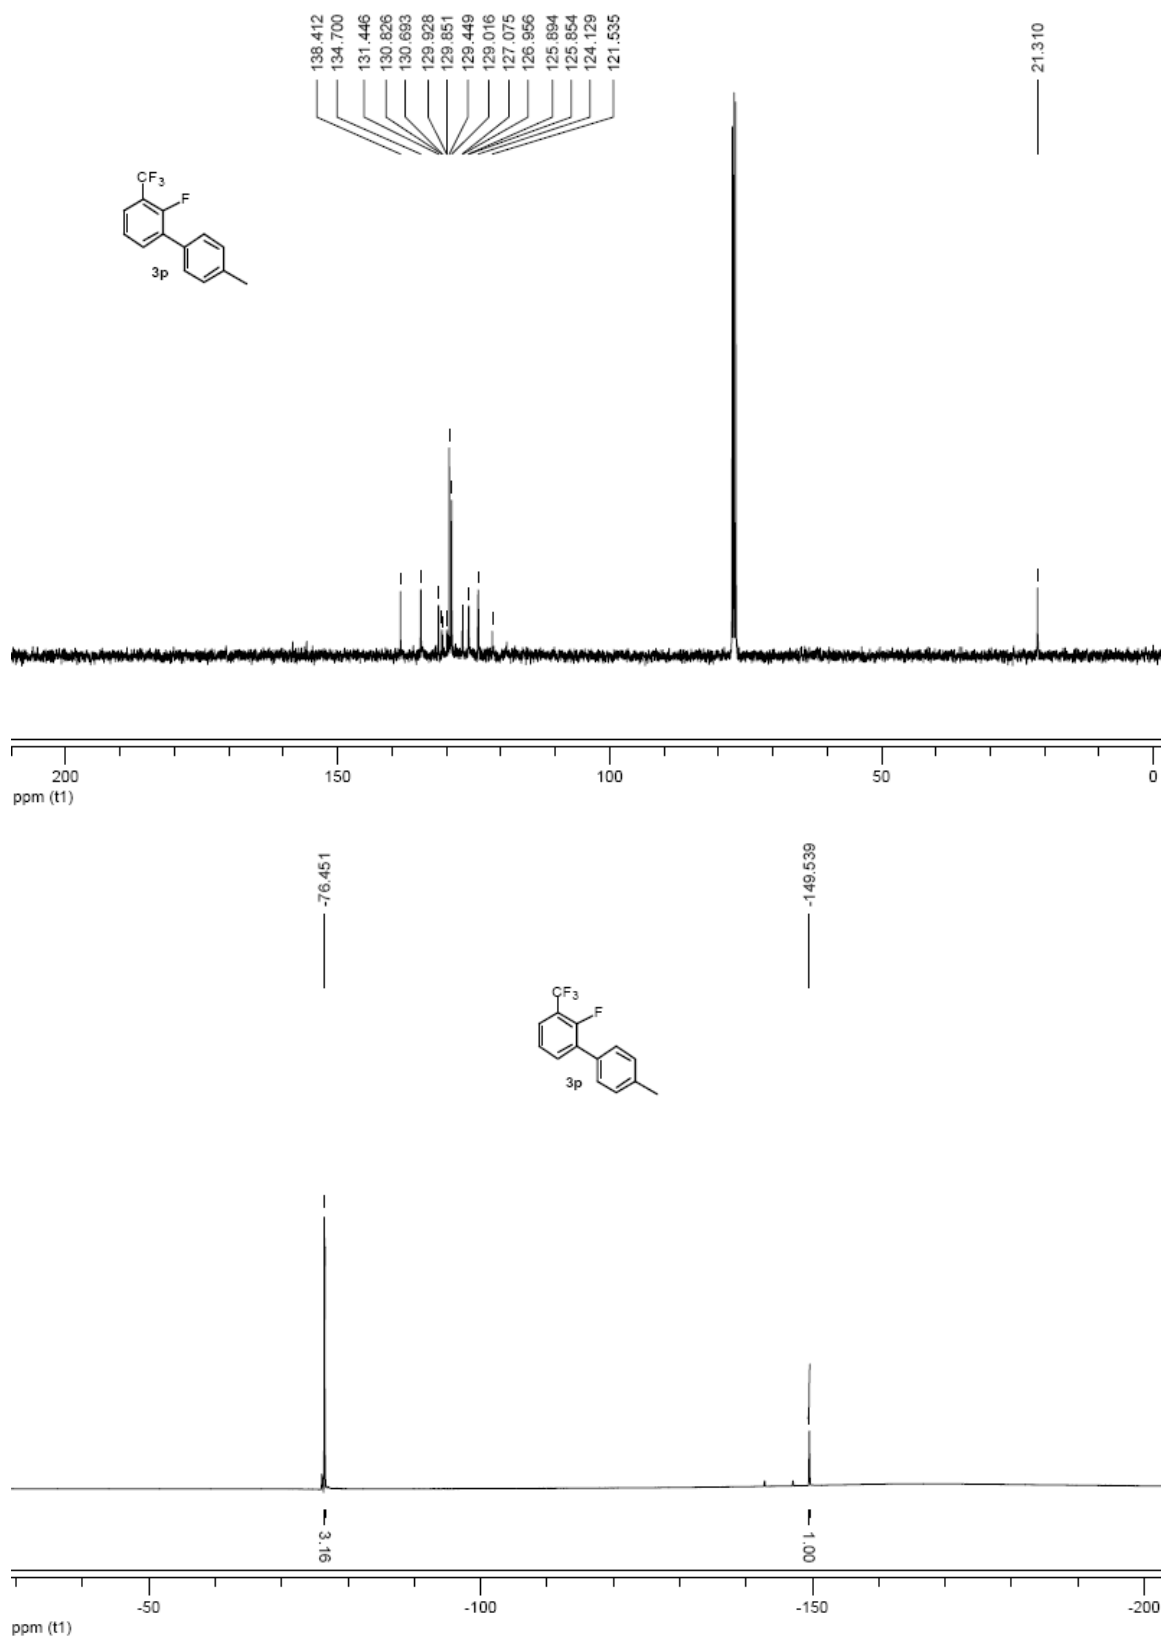

Supplement: c2cc34949c.pdf [file c2cc34949c.pdf]
